# 1 **A mechanical model reveals that non-axisymmetric buckling lowers** 2 **the energy barrier associated with membrane neck constriction**

3 R. Vasan<sup>1</sup>, S. Rudraraju<sup>2</sup>, M. Akamatsu<sup>4</sup>, K. Garikipati<sup>5</sup>, and P. Rangamani<sup>1\*</sup>

4 November 7, 2019

5 <sup>1</sup>Department of Mechanical and Aerospace Engineering, University of California San Diego, La Jolla CA 92093;  
6 <sup>2</sup> Department of Mechanical Engineering, University of Wisconsin-Madison, Madison, WI 53706, USA; <sup>3</sup> Bio-  
7 physics Graduate Group, University of California, Berkeley, CA 94720, USA; <sup>4</sup> Department of Molecular and Cell  
8 Biology, University of California, Berkeley, CA 94720, USA; and <sup>5</sup> Departments of Mechanical Engineering and  
9 Mathematics, Michigan Institute for Computational Discovery & Engineering, University of Michigan, Ann Arbor,  
10 MI 48109, USA.

11 \*Corresponding Author

12 |Email: [padmini.rangamani@eng.ucsd.edu](mailto:padmini.rangamani@eng.ucsd.edu) |

## 13 **Abstract**

14 Membrane neck formation is essential for scission, which, as recent experiments on tubules have demon-  
15 strated, can be location dependent. The diversity of biological machinery that can constrict a neck such as  
16 dynamin, actin, ESCRTs and BAR proteins, and the range of forces and deflection over which they operate,  
17 suggest that the constriction process is functionally mechanical and robust to changes in biological environment.  
18 In this study, we used a mechanical model of the lipid bilayer to systematically investigate the influence of lo-  
19 cation, symmetry constraints, and helical forces on membrane neck constriction. Simulations from our model  
20 demonstrated that the energy barriers associated with constriction of a membrane neck are location-dependent.  
21 Importantly, if symmetry restrictions are relaxed, then the energy barrier for constriction is dramatically lowered  
22 and the membrane buckles at lower values of forcing parameters. Our simulations also show that constriction  
23 due to helical proteins further reduces the energy barrier for neck formation compared to cylindrical proteins.  
24 These studies establish that despite different molecular mechanisms of neck formation in cells, the mechanics  
25 of constriction naturally leads to a loss of symmetry that can lower the energy barrier to constriction.

### **Significance statement**

26 Membrane tubule constriction is a critical step of cellular membrane trafficking processes and is thought to be mechanically regulated. Mechanical modeling techniques employing the Helfrich Hamiltonian and axisymmetric continuum frameworks have previously described energy barriers to constriction as a function of location along a membrane tubule. Recent advances in numerical modeling using spline basis functions (Isogeometric Analysis) enable us to conduct our analyses of membrane mechanics in a generalized 3D framework. Here, we implement a novel 3D Isogeometric Analysis framework and juxtapose it against an axisymmetric model to study the influence of location, symmetry constraints and helical collars on the constriction pathway. We show that an unsymmetric, “crushed soda can” neck consistently displays a lower energy barrier than a symmetric neck.

## 27 **Introduction**

28 Many cellular transport processes involving the plasma membrane including different forms of endocytosis [1, 2, 3],  
29 exocytosis [4, 5], and vesicle budding from intracellular organelles [6, 7] require mechanical deformation of the  
30 cellular membranes. The generation of membrane curvature is essential to trafficking, and the morphology of  
31 membranes has often been characterized as distinct shapes including U- and  $\Omega$ -shaped bud profiles [8, 9, 10] and  
32 tubulovesicular structures [11, 12]. The molecular mechanisms of these processes can be attributed to biochemical  
33 components of the protein machinery involved [13, 14]. For example, in the case of clathrin-mediated endocytosis  
34 (CME), more than 50 proteins are involved in regulating the different steps of membrane invagination such as  
35 nucleation, cargo selection, coat assembly, neck formation and scission [3, 15, 16] and contribute to the robustness  
36 and progression of endocytosis.

37 The formation of a membrane neck and scission are the last steps during many trafficking processes preceding  
38 vesicle formation. This neck formation is mediated by multiple biochemical mechanisms including mechanoen-  
39 zymes belonging to the dynamin family [17], helix insertion due to BAR domain proteins [18] and ESCRT proteins  
40 [19, 20]. A common organizational feature of these different proteins is that they form helical assemblies at the  
41 membrane neck through oligomerization [21, 22].

42 Studies using reconstituted systems of lipid tubules decorated with protein assemblies have identified certain ge-  
43 ometric and mechanical features of scission. Notably, studies of dynamin-mediated scission [23, 24, 25], the  
44 most investigated scission mechanism, have shown that the location of neck formation along a membrane tube,  
45 membrane tension, and bending rigidity play important roles in membrane tube constriction and scission [26]. Col-  
46 lectively, these studies support an emerging view that fundamental physical laws and geometric bounds confer a  
47 universality on membrane constriction phenomena and scission.

48 Crucially, neck formation occurs at a length scale of  $< 10$  nm, which is challenging to image even with high res-  
49 olution electron tomography (ET) as radiation damage and low signal to noise ratio (SNR) can limit contrast [27].  
50 Alternatively, equipped with extensive information from experiments such as those described above, mathemati-  
51 cal and computational models can provide insight to the mechanics and energetics of membrane neck formation.  
52 Almost all of these models are rooted in the Helfrich elastic energy framework [28]. The physical principles under-  
53 lying the Helfrich model are simple enough – the elastic energy of membrane deformation depends primarily on the  
54 curvatures of the membrane. Computational implementation of the governing equations resulting from this model,  
55 however, remain extremely challenging (see [29] for a detailed review). Therefore, many studies have assumed an  
56 axisymmetric configuration of the membrane for ease of computation [9, 10, 30, 31, 32, 33, 34].

57 In the most relevant of these studies to the present work, we and others have shown that a snap-through instability

58 governs the first energy barrier associated with the formation of a membrane neck during CME [9, 35, 36]. An  
59 important limitation of the assumption of axisymmetry is that membrane deformation pathways associated with  
60 neck constriction that may have lower symmetries are not accessible (Figure 1B) and helicoidal protein assemblies  
61 [12, 37, 38] cannot be explicitly modeled.

62 In this study, we systematically investigate the energy barriers to constriction at different locations of a membrane  
63 geometry with and without symmetry restrictions (Figure 1). Importantly, we tackle the challenging problem of  
64 modeling non-axisymmetric membrane deformations with a benchmark comparison to axisymmetric modeling.  
65 We use a minimal, but fundamental, model of collar pressure-mediated tube constriction to obtain insights from a  
66 mechanical and energetic perspective. Using this model, we seek to answer the following foundational questions  
67 for the broader field of membrane deformation processes: *First*, how does the local pre-existing curvature along  
68 a tube influence the energy barrier associated with neck constriction? *Second*, how does relaxation of *a priori*  
69 imposed symmetry restrictions impact the energy barriers associated with constriction of the neck? *And finally*,  
70 how do cylindrical versus helical protein assemblies modulate this energy barrier?

71 To answer these questions, we have developed a computational framework for solving membrane mechanics prob-  
72 lems on complex geometries using numerical techniques that exploit Galerkin methods, specifically Isogeometric  
73 Analysis [39]. This framework draws upon recent far-reaching advances on the use of spline basis functions in com-  
74 putational mechanics and brings them to the world of biological membranes, while building upon recent literature  
75 on finite element modeling of liquid shells [40]. As a result, we can now investigate membrane deformation using  
76 simulations of neck constrictions under conditions that are notably less restrictive than those adopted previously in  
77 the literature (i.e. no enforced axis of symmetry). Importantly, this allows us to probe realistic helical constriction  
78 pathways within a continuum framework, a different approach than recent efforts using coarse-grained modeling  
79 [37]. Using this framework, we applied constriction pressures at three different locations along the membrane  
80 tube (see Figure 2) – the ‘cap’ (positive mean and Gaussian curvature), ‘cylindrical tube’ (positive mean and zero  
81 Gaussian curvature), and ‘base’ (Positive- negative mean and negative Gaussian curvature). Our simulations show  
82 that the energy barriers associated with membrane neck constriction are indeed curvature-dependent, and therefore  
83 location-dependent, regardless of symmetry restrictions. Most importantly, we show that access to less symmetric  
84 shapes of membrane deformation lowers the energy barrier for scission considerably. These results suggest that  
85 loss of symmetry of the membrane neck may be an important energetic feature of successful neck formation.

Table 1: Model parameter values

| Parameter                                            | Value                                   | Reference |
|------------------------------------------------------|-----------------------------------------|-----------|
| 1. Boundary membrane tension ( $\lambda_0$ )         | $10^{-2} - 10^{-1}$ pN·nm <sup>-1</sup> | [51, 52]  |
| 2. Bending rigidity of bare membrane ( $\kappa$ )    | 320 pN·nm                               | [53]      |
| 3. Length scale for non-dimensionalization ( $R_0$ ) | 20 nm                                   | [9]       |

## 86 Model development and simulations

### 87 Helfrich energy

88 The lipid bilayer is modeled as a thin elastic shell using the Helfrich energy [28] based on the assumption that the  
89 thickness of the bilayer is negligible compared to its radius of curvature [23, 41]. The Helfrich energy density is  
90 defined as

$$W = \kappa H^2 + \kappa_G K, \quad (1)$$

91 where  $\kappa$  is the bending rigidity,  $H$  is the mean curvature,  $K$  is the Gaussian curvature and  $\kappa_G$  is the Gaussian  
92 rigidity. Furthermore, we assume that the membrane is incompressible (*i.e* the membrane area is constant ) [42]—a  
93 constraint that is implemented using a Lagrange multiplier field. Thus, while the Helfrich energy is defined entirely  
94 in terms of the geometry of the surface, the Lagrange multiplier, often interpreted as membrane tension [43, 44],  
95 is an important parameter that determines the minimum energy configuration. We ignore any fluid [45, 46] and  
96 friction [47, 48, 49] properties of the bilayer, guided by the dominance of unstable and stable equilibrium states  
97 over relaxation/rate processes. The augmented Helfrich Hamiltonian that is being minimized on the surface  $\Omega$ ,  
98 including the Lagrange multiplier  $\lambda$  is given as [44, 45, 50]

$$E = \int_{\Omega} (\kappa H^2 + \kappa_G K + \lambda) dA. \quad (2)$$

## 99 **Simulations in axisymmetric coordinates**

100 In axisymmetry, the membrane is modeled using coordinates defined in Figure 1A. As the membrane tubule (Fig.  
101 2E) has three distinct shape features (Fig. 2A - Cap, Tube and Base), local membrane geometries were modeled as  
102 a hemispherical cap (Fig. 2B, Case 1), cylindrical tube (Fig. 2C, Case 2) and a curved base with negative Gaussian  
103 curvature (Fig. 2D, Case 3). Cases 1 and 2 are constant mean curvature shapes and are solved as two-point  
104 boundary value problems. Case 3 is a negative Gaussian curvature shape with an inflection point in mean curvature  
105 with respect to the arc length and is solved as a three point boundary value problem. Case 4 includes local geometric  
106 variations in both mean and Gaussian curvature and is solved as a three point boundary value problem. The third  
107 point in these cases is an additional interface point enforced at the location of constriction, such that it satisfies  
108 continuity requirements [54]. The resulting system of equations is solved using the partial differential equation  
109 solution routines in Matlab, specifically `bvp4c` [54, 55]. Importantly, these equations are solved using both force  
110 control (compute membrane shape for a certain applied force) and displacement control (compute applied force  
111 for a certain membrane shape). These two approaches can lead to the same equilibrium membrane shape. In the  
112 presence of membrane bending instabilities, displacement control can access regimes of the response curve that  
113 force control cannot reach. However, this requires a precise prescription of the kinematic path. In order that a  
114 system be free to find the lowest energy pathways through a region of instability in its energy landscape, it is  
115 important that, while the force and displacement vary in a coupled manner, neither quantity be fully prescribed  
116 [9, 56]. Parameters for the bending rigidity, membrane tension and non-dimensionalization length  $R_0$  are specified  
117 in Table 1. Details of the numerical methods are provided in the Supplementary Online Material (SOM).

## 118 **3D numerical model development and validation**

119 The membrane deformation problems considered in this paper can be modeled using classical thin shell theories  
120 of mechanics. However, given the geometric complexity and the associated boundary conditions, analytical so-  
121 lutions are inaccessible. Instead, we obtain three dimensional numerical solutions to the membrane deformation  
122 problems using the framework of Isogeometric Analysis (IGA) [39]. An IGA method-based membrane mechanics  
123 framework has been developed for this work, and is build on top of the PetIGA [57] open source library. In an IGA  
124 approach, the membrane geometry is discretized using a spline mesh and the governing equations (Fig. 1B, see thin  
125 shell formulation in the Supplementary Information) are converted to a nonlinear system of equations. This non-  
126 linear system of equations is then solved to obtain the deformed membrane shape, and the related force and energy  
127 metrics. Of importance to our central result is that this framework naturally admits both symmetric and asymmetric  
128 deformation modes driven by the underlying physics. This framework has three key assumptions. First, a funda-  
129 mental conjecture of the Helfrich model is that the characteristic length scales of the problem are much larger than

130 the thickness of the bilayer [28]. This assumption allows us to neglect the effect of transverse shear deformations  
131 and consider the classical Kirchhoff–Love shell kinematics for thin shell geometries [58]. Second, numerical so-  
132 lutions to the membrane shape equations (Equations (14) and (15)) in general coordinates are challenging because  
133 of continuity requirements in the numerical scheme. We have overcome this challenge by adopting both B-Spline  
134 basis functions, which allow high-order continuity, and the numerical framework of Isogeometric Analysis [39].  
135 Finally, an inherent limitation of the Helfrich energy formulation in three dimensional simulations is the lack of  
136 resistance to shear deformation modes. The zero energy modes corresponding to shear deformation are eliminated  
137 in this framework by adding shear stabilization terms of smaller magnitude relative to the traditional bending terms  
138 in the Helfrich energy [40], thus restoring stability to the numerical model. A companion manuscript (in prepara-  
139 tion by the authors) describes the details of the mathematical methods and numerical formulation, and establishes  
140 the validity of the computational framework by modeling a range of problems in membrane mechanics. Here, we  
141 present a validation of the 3D computational framework by comparing the output from the simulation with a known  
142 analytical solution of the classical tube pulling problem (Figure S1A, B). In addition to demonstrating good agree-  
143 ment with the analytical solution, the 3D model also resolves the symmetric pathways of deformation if they are  
144 indeed the energy minimizing modes (Figure S1A). Having validated the 3D numerical scheme, we then proceeded  
145 to simulate the different cases shown in (Figure 2B-E) and compared them against axisymmetric pathways. We use  
146 three key metrics to compare the two models – (1) the radial pinching load, represented by the collar pressure that  
147 drives constriction, (2) structural stiffness of the membrane, defined as the slope of the load-displacement response,  
148 and (3) membrane bending energy. We track these metrics for different pinching radii, which are defined as the  
149 shortest distances between the membrane and the center of the necking region. For fully symmetric configurations  
150 and those with lower symmetry, this distance is the radius of the smallest circle that can be fit in the necking region.

## 151 **Results**

152 We systematically investigated the role of preexisting curvature (varying with location on the membrane) in the  
153 constriction process and the associated energy landscape using both the traditional axisymmetric calculations and  
154 the 3D computational framework. The constriction process is modeled using a collar pressure ( $\text{pN}/\text{nm}^2$ ) applied  
155 onto a fixed membrane height (nm). In this study, we include the effect of the height of applied pressure by  
156 reporting a force per unit length, or an effective surface pressure ( $\text{pN}/\text{nm}$ ), as the product of the applied collar  
157 pressure and the fixed height. Our main results can be summarized as follows – *first*, the energy landscape for  
158 constriction depends on the preexisting curvature of the membrane; *second*, 3D modes of constriction with less  
159 than full symmetry encounter lower energy barriers when compared to pathways of higher symmetry; and *finally*,  
160 helical constriction modes can have the lowest energy barriers of all in 3D. We elaborate on these findings in detail

161 below.

## 162 **The energy barrier associated with constriction depends on preexisting membrane curvature**

163 We investigated the effect of local, preexisting curvature on the energy barrier associated with tubule constriction  
164 in axisymmetry. We pulled out a membrane tube by applying an external axial force ( $f_{axial}$ ) on a small patch of  
165 the membrane to mimic a point load while maintaining a membrane tension of 0.2 pN/nm [59]. We then applied  
166 a radial collar pressure at different locations on the tube (Figure 3A) while maintaining the membrane height, a  
167 setup that can be generalized to *in-vitro* membrane tubules pulled by optical tweezers. In the absence of a fixed  
168 height applied as a boundary condition, the membrane deforms freely in the axial direction at negligible collar  
169 pressures (Figure S2). Results from our simulations show that pinching the tube at the cap (positive mean and  
170 Gaussian curvature) and along the cylinder (positive mean and zero Gaussian curvature) results in similar force-  
171 shape relationship (Figure 3D) and the cross section of the pinched profile remains circular by construction due to  
172 the restriction of axisymmetry. (Figure 3B,C). Surprisingly, for the same range of collar pressure applied to the base  
173 (positive-negative mean and negative Gaussian curvature), we observed the existence of a snap-through instability  
174 as the membrane constriction progresses, as shown by the red line in Figure 3D. The dotted lines (Figure 3D, base)  
175 are calculated using displacement control, i.e., compute the applied force given the membrane shape. However,  
176 given our initial conditions and the mechanism of neck formation via increasing pressure, these shapes are not  
177 accessible during constriction. As in all snap-through instabilities, this pinching instability arises from a reduced  
178 energy barrier and associated reduction in neck radius, and has been reported in other membrane physical processes  
179 as well [9, 35, 36]. Despite the existence of the snap-through instability at the base, the pressure needed for  
180 further constriction becomes unbounded as the pinching radius approaches zero. This suggests that fully symmetric  
181 membrane shapes are not favorable for constriction below a certain critical radius.

## 182 **Relaxation of symmetry constraints lowers the energy barrier associated with membrane constrict-** 183 **tion**

184 We next asked if relaxation of symmetry constraints alters the energy landscape of location-dependent constrict-  
185 tion. To answer this question, we used our 3D model. For these simulations, we initialized the computation as a  
186 pre-formed membrane tubule to limit computational complexity (see SOM). Strikingly, we observed that once the  
187 symmetry constraints are relaxed, membrane constriction at all three locations requires a lower collar pressure by  
188 more than an order of magnitude when compared to the axisymmetric deformation (compare Figure 4D and Fig-  
189 ure 3D). To verify this result, we enforced axisymmetry constraints in the 3D model and repeated our calculations  
190 for the “cap” (Figure 2B) and “tube” (Figure 2C). We observed that the collar pressures increased by an order of



191 magnitude (Figures S3 and S4) when symmetry is imposed, resulting in comparable pinching profiles between the  
192 axisymmetric and 3D models. However, without the imposed axisymmetry, the collar pressures reduced signifi-  
193 cantly (Figure S5). These results allow us to conclude that absence of enforced axisymmetry alone is responsible  
194 for the significant decrease of collar pressure. We next analyzed the shapes of the membrane cross sections during  
195 3D constrictions, which we found to be distinctly reminiscent of buckling phenomena that are observed in thin  
196 walled elastic structures [60, 61]. The pinching profiles shown in Figure 4C correspond closely to the classical  
197 result of the first buckling mode of a thin ring subjected to inward pressure on its walls. These deformation modes  
198 of buckling/pinching in thin-walled elastic rings and tubes have been known since the early twentieth century in the  
199 context of structural engineering applications [62, 63, 64, 65, 66, 67], and are also observed experimentally [68].

200 Finally, we observed that the base, with the preexisting negative Gaussian curvature, needed lower collar pressure  
201 to undergo constriction. This result is consistent with the observation that membranes with a negative Gaussian  
202 curvature are more amenable to constriction. Furthermore, contrary to the case of axisymmetric deformation,  
203 the collar pressure associated with increasing constriction at the base does not continue to grow with constriction  
204 (compare Figure 4D, red line and Figure 3D, red line). While the collar pressure increases sharply for initial  
205 constriction (Figure 4D, inset), it only rises gradually for the tube and cap geometries as constriction continues  
206 to increase several-fold. The initial increase in compressibility represents the natural stiffness of the membrane,  
207 after which symmetry breaking occurs leading to near spontaneous constriction. This result suggests that without  
208 the arbitrary restriction to axisymmetric deformation, near-spontaneous collapse of the neck is possible after a  
209 critical collar pressure is reached. The sudden drop in stiffness observed for the base geometry (Figure 4D) is  
210 associated with symmetry-breaking. As shown, this symmetry-breaking and loss of stiffness is not immediate, but  
211 occurs after a small amount of constriction has occurred. Thus, we predict that the energy landscape of membrane  
212 neck constriction is location dependent, but more importantly, predict that lower symmetry shapes attained by 3D  
213 constriction can significantly lower the energy barrier at the base to promote easier constriction.

#### 214 **Easier constriction at the base is accompanied by reduced membrane stiffness.**

215 We further investigated the energy landscape at the base of the tubule (Figure 2D) to identify the mechanisms  
216 associated with easier constriction. For the axisymmetric pinching pathway, an increase in collar pressure results  
217 in progressive transformation of the tubule into a half-catenoid-shaped membrane. Indeed, this is the shape that  
218 is commonly seen in schematics of membrane pinching (Figure 5A). On the other hand, application of increasing  
219 collar pressure in 3D demonstrates that the membrane base is quick to break symmetry, and assumes the iconic  
220 shape of a soda can crushed by radial pinching (Figure 5B). We thus observe that the axisymmetric and 3D models  
221 invoke different constriction pathways; the axisymmetric model yields uniform pinching (Figure 5A), but the 3D

222 model captures an asymmetric flattened tubule geometry (Figure 5B).

223 As before, the axisymmetric mode shows a snap-through instability (Figure 5C, Figure S6B). This instability can  
224 be attributed to a build up of negative tangential stress or tension work (Figure S6E). The sharp increase of both  
225 the bending energy (Figure S6D) and tension work (Figure S6E) at large constriction corresponds to a sharp in-  
226 crease in the pressure required for constriction (Figure 5C, Figure S6B). However, in 3D, a narrow constriction  
227 radius is accessible at a much lower pressure when compared with the axisymmetric mode. This result can be  
228 understood by analyzing the relationship between stiffness and constriction of the membrane in different modes  
229 of deformation (Figure 5D). The stiffness of the membrane is significantly reduced in the lower symmetry mode  
230 attained in 3D when compared with the axisymmetric mode (compare black circle lines and red diamond lines in  
231 Figure 5D). Similar comparisons for the tube (Figure S5) show a significantly reduced stiffness in lower symmetry  
232 pathways of 3D constriction when compared with axisymmetric pathways. Comparison of the bending energy in  
233 the axisymmetric and 3D modes of deformation shows that while the bending energies in both cases are similar  
234 in magnitude, the energy landscape is different (Figure 5E). All intermediate energy states along the constriction  
235 of the neck radius are accessible in the 3D pathway of deformation while in the axisymmetric pathway the energy  
236 states associated with the snap-through regime are inaccessible (dashed grey region in Figure 5E). From these anal-  
237 yses, we conclude that easier constriction at the base of the tube, revealed by full 3D computations, is accompanied  
238 by a reduced membrane stiffness and accessibility to all intermediate energy states along the constriction path.

### 239 **Helical force collar further reduces the barrier to membrane neck constriction**

240 The 3D model of membrane deformation allows us to probe the response of the membrane to non-symmetric force  
241 distributions such as those exerted by helical arrangements of proteins that cannot be modeled in the axisymmetric  
242 framework. Membrane scaffolding proteins such as dynamin [33, 38] and ESCRT-III [69] self-assemble into helical  
243 collars that can constrict the neck. Recent Cryo-EM maps of human dynamin-1 (dyn-1) polymer report detailed  
244 structural and molecular information on its helical geometry [12]. With GTP hydrolysis, the helical polymer  
245 actively constricts the membrane from a diameter of more than 20 nm to below 3.4 nm [12]. Disassembly of  
246 dynamin is thought to promote scission via hemifission [37, 70, 71]. Despite the well-established mechanisms of  
247 dynamin-mediated constriction, the response of the membrane to constriction and subsequent scission is not yet  
248 fully understood. This led us to investigate the role of a helical collar pressure, which is a mimic of force generated  
249 by helical protein assemblies, on membrane constriction. We explore the role of two geometric parameters of a  
250 helical collar – the pitch, defined as the distance along the axis for a complete helical turn, and the number of rings.  
251 We first consider a single helical ring exerting a collar pressure on a cylindrical tube (Figure 6A) with different  
252 values of the pitch, non-dimensionalized by the height of the collar. Increasing helical pitch corresponds to an

253 increased span (with same collar area) over which the load is distributed on the geometry. Qualitatively, we observe  
254 that the cross section of the neck is non-axisymmetric for different values of the pitch, confirming that the lower  
255 symmetry modes of deformation are still preferred for neck constriction with helical rings of pressure (Figure 6B,  
256 C). Quantitatively, the collar pressure associated with constriction decreases as the pitch increases (Figure 6D).  
257 Correspondingly, the stiffness also decreases for increased pitch (Figure 6E), indicating that the bending energy  
258 (Figure 6F) becomes slightly less steep. The pink and blue shaded regions in Figure 6E indicate regions of high  
259 and low stiffness (easier constriction) respectively. From these observations, we conclude that helical collars have  
260 the ability to further reduce the energy barrier to membrane constriction by a decrease in collar pressure and  
261 stiffness associated with this process, and that the pitch of the helix is an important determinant of this barrier.

262 To our knowledge, this is the first numerical characterization of the effect of helical squeezing forces on membrane  
263 constriction in a continuum framework. However, from a soft matter perspective, it is well-known that helical  
264 structures are known to exert squeezing forces more effectively on their support; an excellent example of this  
265 behavior can be found in the twining of plant vines [72, 73, 74] and other naturally occurring soft materials. Like  
266 cylindrical forces, helices also exert tangential and radial forces. Additionally, because of the pitch of the helix,  
267 they also exert axial forces.

268 Given our observation that the base of the tube is energetically favorable to constriction (Figure 5), we next added  
269 a helical collar pressure to the base to investigate the effect of coupling the three key design elements – negative  
270 Gaussian curvature, access to non-axisymmetric modes, and helical collar pressure (Figure 7A) – on membrane  
271 neck constriction. We found that this combination also results in reduced collar pressure (Figure 7D) and energy  
272 barrier (Figure 7F) with increasing constriction when compared to a ring of collar pressure (Figure 7D,F for zero  
273 pitch). However, a ring of lower pitch was advantageous in terms of a lower stiffness; the stiffness for Pitch 4 is  
274 greater than that associated with Pitch 0 (Figure 7E). This is possibly the result of recruiting the stiffer cylindrical  
275 portion of the membrane tube with greater pitch.

276 Comparing the effect of helical pinching on the tube (Figure 6) versus the base (Figure 7), we arrive at the following  
277 conclusions. For a single helical ring, the relationship between helix geometry and the membrane geometry is non-  
278 trivial. It appears while both the tube and base geometry show a clear relationship between helical pitch and collar  
279 pressure (Figure 6D, Figure 7D), the same is not true for the stiffness (Figure 6E, Figure 7E). This suggests a  
280 complex interaction between the geometries of the membrane and the helical ring, possibly due to a mechanical  
281 feedback between membrane curvature and the constricting action of the helices.

## 282 **Effects of multiple helical collars are also location-dependent**

283 Since a helical ring of collar pressure offers a lower energy barrier to constriction, we next asked if an increase  
284 in the number of helical rings can further promote scission. This question is motivated by observations that an  
285 increase in the number of dynamin rings is a predicted response to delayed scission and higher membrane tension  
286 [24, 75, 76, 77]. To answer this question, we simulated 3 rings of helical collar pressure reminiscent of dynamin  
287 rings assembled on a membrane tubule [12, 38, 76]. More than 3 rings of a dynamin collar are unlikely to exist  
288 *in vivo* due to disassembly of the dynamin oligomer [78]. Collar pressure due to multiple helical rings not only  
289 leads to membrane constriction as expected (Figure 8A) but also appears to stabilize the membrane tube against a  
290 sideways wobble that is observed with one ring (compare Figure 6B with Figure 8B). We also observed that while  
291 the values of the collar pressure are of the same order of magnitude for 3 rings as with 1 ring (compare Figure 6D  
292 and Figure 8C), the stiffness profile is different (Figure 8D). During the early part of the constriction, the stiffness  
293 values go from high to low, quickly leading to a region of easier constriction (Figure 8D, blue shaded region).  
294 However as constriction increases, the stiffness increases again over a finite range of constriction and at a lower  
295 value of constriction (Figure 8D, pink shaded region), unlike the very narrow range of stiffening in Figure 6E.  
296 This may be due to the increase in the surface area that is constricted by three rings as compared to the surface  
297 area constricted by one ring, increasing the structural resistance to constriction. Thus, multiple rings assist neck  
298 formation on a tubule during an initial constriction region (Figure 8D, 4 - 15 nm of constriction), after which  
299 disassembly and possibly additional proteins are required.

300 Interestingly, the presence of 3 rings at the base resulted in an increase in both the collar pressure (Figure 8G) and  
301 stiffness (Figure 8H), such that the region of easier constriction (Figure 8H, blue shaded region) is much smaller  
302 than for a single helical ring (Figure 7E, blue shaded region). The membrane then transitions into a region of high  
303 stiffness at a smaller value of constriction (Figure 8H, pink shaded region) due to the larger surface area of the three  
304 rings that recruits more of the cylindrical tube to resist constriction.

305 Furthermore, multiple helical rings achieve easier constriction at shorter constriction distances for a cylindrical ge-  
306 ometry (Figure 8D, blue region) and at larger constriction distances for the base geometry (Figure 8H, blue region).  
307 However, they resist further constriction at narrow radii independently of the pre-existing curvature (Figure 8D and  
308 Figure 8H, pink region) . Given these observations, it is possible that helical polymers might preferentially undergo  
309 conformational rearrangements such as a change in pitch or number of rings based on feedback with the underly-  
310 ing membrane curvature so as to achieve a lower energy barrier to constriction. Such structural rearrangements in  
311 dynamin have also been reported in experiments [12].

## 312 Discussion

313 Membrane constriction and subsequent scission are universal to membrane remodeling processes *in vitro* and *in*  
314 *vivo*. While the molecular machineries may differ across systems, these deformation processes likely share the  
315 same common physical principles. In this study, using computational modeling, we show that there are three  
316 key design elements that play important roles in promoting membrane constriction – (1) location *i.e.* preexisting  
317 curvature of the membrane being constricted, (2) access to lower-symmetry modes of deformation, and (3) access  
318 to helical loading.

319 From a mechanical standpoint, membrane constriction can be interpreted as a deformation mechanism driven by  
320 a radial collar pressure applied by the scission proteins in the vicinity of the necking region. For axisymmetric  
321 constriction, the pinching pressure needed to cause membrane constriction increases with the narrowing of the neck  
322 radius. This monotonic growth of the radial pressure results in a high energy barrier for pinching. Interestingly,  
323 many elastic structures have inherent modes of instability that result in enhanced deformation or even collapse in  
324 response to loading and are associated with lower energy barriers. Such modes are ubiquitous in thin elastic shells  
325 and manifest as folding, wrinkling, creasing, and buckling deformations (e.g. wrinkling of thin membranes and  
326 graphene sheets [79], surface tension induced buckling of liquid-lined elastic tubes [80], snap-through of elastic  
327 columns [81], barrelling modes of thin cylinders [60, 61], etc.). Notably, they have lower symmetry than the  
328 fully axisymmetric deformations. If such modes exist, and are accessible in cell membranes, their being triggered  
329 would naturally lead to a reduction in the energy barrier to constriction and scission. Building on this conventional  
330 understanding of buckling analysis of thin-walled structures, we predict the existence of lower energy modes of  
331 constriction in membrane tubules. The conclusions from our simulations provide insight to a number of recent  
332 experimental studies and suggest new experimental design as discussed below.

333 Dynamin and dynamin-related proteins (DRPs) have been shown to be essential for scission events during mito-  
334 chondrial division [82] and during clathrin-mediated endocytosis via mechanical feedback with actin in both yeast  
335 [83, 84] and mammalian cells [85]. In dynamin-mediated fission during endocytosis [86, 87], dynamin preferen-  
336 tially interacts with curved membranes [88, 89], indicating a curvature dependence. Morlot *et al.* [23] showed  
337 that the local energy barrier to constriction is lower at the edge of the dynamin helix (large curvature) in optical  
338 tweezer experiments of dynamin-mediated fission. More recent experiments and models suggest that fission can  
339 also occur in the middle of the dynamin-coated region [37, 90]. While our results cannot confirm where fission  
340 will occur, we predict two important effects - (1) constriction is indeed curvature-dependent and (2) the membrane  
341 shape at the center of a given helical pitch is highly curved in 3D. These predictions are consistent with observa-  
342 tions [23, 90, 91]. For example, Dar *et al.* [90] showed that dynamin1 polymers cause membrane constriction with  
343 high probability when the tubule radius approaches 16 nm or less, consistent with predictions from our model (see

344 Figure 2F of [90] and compare against Figure 6E, J).

345 A central conclusion from this study is that a crushed soda can shape of the neck is energetically favorable for  
346 constriction over radially symmetric pinching. This prediction suggests that mechanisms such as those proposed  
347 in Figure 6 of Dar *et al.* can be revised to include lower degrees of symmetry (compare Figure 6 of [90] with  
348 Figure 6B). With advances in 3D imaging methods such as electron tomography, it should be possible to examine  
349 the cross-sections of necks during the progression of constriction by different molecular machines and quantify the  
350 relationship between membrane tubule symmetry and the particular protein assembly. Furthermore, determining  
351 the curvature-dependent rate constants for these proteins binding to the membrane will be important to quantify  
352 the relationship between the shape of the buckled membrane and the disassembly of monomers from polymerizing  
353 helical filaments such as dynamin [88, 92]. We predict that this feedback between membrane curvature and ki-  
354 netics of helix assembly-disassembly is particularly important for the membrane curvatures where our simulations  
355 determine that it is energetically expensive for multiple rings to achieve the progression to scission.

356 Our results also apply to cases where dynamin is not involved in the scission process. In the absence of dynamin,  
357 BAR domain proteins and actin are thought to work closely in the formation of long tubular necks [93]. Indeed, in  
358 dynamin and clathrin-independent endocytosis, actin is the primary driver of scission of tubular invaginations via  
359 a constriction force [94]. These observations suggest that while scission may be less efficient, it is still functional  
360 in the absence of dynamin. Our results show that cylindrical collars, such as those enforced by actin, can promote  
361 constriction in the absence of dynamin.

362 From a structural mechanics standpoint, the differences in the membrane responses to helical versus cylindrical col-  
363 lars can also be understood by drawing analogies again with the buckling of thin cylindrical tubes. The distributed  
364 radial pressure in a helical collar creates an lateral torque that induces a bending moment on the tube. Under these  
365 conditions, the cylindrical tubes are now susceptible to both radial collapse (through pinching) and buckling under  
366 bending moment, which can cause accelerated pinching. The soda can shape also locally reduces the area moment  
367 of inertia and this can induce buckling through a process called buckling by ovalization [95]. In a completely dif-  
368 ferent setting, the helical structures of twining vines are also known to exert squeezing forces on the support rods,  
369 suggesting that helical structures as force generating mechanisms are quite common in nature at different scales  
370 [73]. The helical collar mechanism opens up a wider parameter space (helical pitch, collar height, lateral bending,  
371 squeeze induced by helical twist, etc.) to optimize for achieving effective pinching. Such analogies with common  
372 engineering principles and with biological materials can help build our intuition on membrane-protein interactions;  
373 however, we note that the results presented in this work are specific to elastic, incompressible membranes only.

374 Based on the insights derived from our simulations, future work should include further complexities such as the in-  
375 fluence of the structure of the helical polymer, the compositional heterogeneity of cellular membranes and the effect

376 of contact constraints between the protein and tubule that can permit potential sliding of the protein on the tubule  
377 during the scission process. While recent molecular dynamics (MD) simulations of dynamin-mediated fission also  
378 reveal non axisymmetric pathways of constriction via the formation of transient pores [37], better connections be-  
379 tween continuum descriptions of the lipid bilayer and membrane-protein interactions at the mesoscale need to be  
380 developed to close this gap. This is an ongoing research effort in our group.

## 381 **Acknowledgements**

382 We would like to thank David Drubin, Jasmine Nirody, and Morgan Chabanon for their feedback on the study.  
383 P.R. would like to acknowledge the Office of Naval Research N00014-17-1-2628. S.R. would like to acknowledge  
384 the Wisconsin Alumni Research Foundation (WARF) and the Grainger Institute for Engineering at UW-Madison  
385 for funding support, and thank Prof. Xiaoping Qian at UW-Madison for his advise on geometric modeling. M.A.  
386 would like to acknowledge the Arnold O. Beckman Postdoctoral Fellowship. KG would like to acknowledge NSF  
387 DMREF grant #1729166.

## 388 **References**

- 389 [1] Joseph L Goldstein, Richard GW Anderson, and Michael S Brown. Coated pits, coated vesicles, and receptor-  
390 mediated endocytosis. Nature, 279(5715):679, 1979.
- 391 [2] Joanna Rejman, Volker Oberle, Inge S Zuhorn, and Dick Hoekstra. Size-dependent internalization of particles  
392 via the pathways of clathrin-and caveolae-mediated endocytosis. Biochemical Journal, 377(1):159–169, 2004.
- 393 [3] Jasper Weinberg and David G Drubin. Clathrin-mediated endocytosis in budding yeast. Trends in cell biology,  
394 22(1):1–13, 2012.
- 395 [4] R Bryan Sutton, Dirk Fasshauer, Reinhard Jahn, and Axel T Brunger. Crystal structure of a snare complex  
396 involved in synaptic exocytosis at 2.4 Å resolution. Nature, 395(6700):347, 1998.
- 397 [5] Claudio G Giraudo, William S Eng, Thomas J Melia, and James E Rothman. A clamping mechanism involved  
398 in snare-dependent exocytosis. Science, 313(5787):676–680, 2006.
- 399 [6] James E Rothman and Felix T Wieland. Protein sorting by transport vesicles. Science, 272(5259):227–234,  
400 1996.
- 401 [7] Suresh Mathivanan, Hong Ji, and Richard J Simpson. Exosomes: extracellular organelles important in inter-  
402 cellular communication. Journal of proteomics, 73(10):1907–1920, 2010.
- 403 [8] Ori Avinoam, Martin Schorb, Carsten J Beese, John AG Briggs, and Marko Kaksonen. Endocytic sites mature  
404 by continuous bending and remodeling of the clathrin coat. Science, 348(6241):1369–1372, 2015.
- 405 [9] Julian E Hassinger, George Oster, David G Drubin, and Padmini Rangamani. Design principles for ro-  
406 bust vesiculation in clathrin-mediated endocytosis. Proceedings of the National Academy of Sciences,  
407 114(7):E1118–E1127, 2017.
- 408 [10] Haleh Alimohamadi, Ritvik Vasan, Julian Hassinger, Jeanne Stachowiak, and Padmini Rangamani. The role  
409 of traction in membrane curvature generation. Biophysical Journal, 114(3):600a, 2018.
- 410 [11] Holly C Dippold, Michelle M Ng, Suzette E Farber-Katz, Sun-Kyung Lee, Monica L Kerr, Marshall C Pe-  
411 terman, Ronald Sim, Patricia A Wiharto, Kenneth A Galbraith, Swetha Madhavarapu, et al. Golp3 bridges  
412 phosphatidylinositol-4-phosphate and actomyosin to stretch and shape the golgi to promote budding. Cell,  
413 139(2):337–351, 2009.
- 414 [12] Leopold Kong, Kem A Sochacki, Huaibin Wang, Shunming Fang, Bertram Canagarajah, Andrew D Kehr,  
415 William J Rice, Marie-Paule Strub, Justin W Taraska, and Jenny E Hinshaw. Cryo-em of the dynamin polymer  
416 assembled on lipid membrane. Nature, 560(7717):258, 2018.



- 417 [13] Satyajit Mayor and Richard E Pagano. Pathways of clathrin-independent endocytosis. Nature reviews  
418 Molecular cell biology, 8(8):603, 2007.
- 419 [14] Marko Kaksonen, Christopher P Toret, and David G Drubin. A modular design for the clathrin-and actin-  
420 mediated endocytosis machinery. Cell, 123(2):305–320, 2005.
- 421 [15] Marko Kaksonen and Aurélien Roux. Mechanisms of clathrin-mediated endocytosis. Nature Reviews  
422 Molecular Cell Biology, 2018.
- 423 [16] Åsa EY Engqvist-Goldstein, Robin A Warren, Michael M Kessels, James H Keen, John Heuser, and David G  
424 Drubin. The actin-binding protein hip1r associates with clathrin during early stages of endocytosis and pro-  
425 motes clathrin assembly in vitro. The Journal of cell biology, 154(6):1209–1224, 2001.
- 426 [17] Eric Macia, Marcelo Ehrlich, Ramiro Massol, Emmanuel Boucrot, Christian Brunner, and Tomas Kirch-  
427 hausen. Dynasore, a cell-permeable inhibitor of dynamin. Developmental cell, 10(6):839–850, 2006.
- 428 [18] Emmanuel Boucrot, Adi Pick, Gamze Camdere, Nicole Liska, Emma Evergren, Harvey T McMahon, and  
429 Michael M Kozlov. Membrane fission is promoted by insertion of amphipathic helices and is restricted by  
430 crescent bar domains. Cell, 149(1):124–136, 2012.
- 431 [19] James H Hurley and Phyllis I Hanson. Membrane budding and scission by the escrt machinery: it’s all in the  
432 neck. Nature reviews Molecular cell biology, 11(8):556–566, 2010.
- 433 [20] Diego A Ramirez-Diaz, Adrian Merino-Salomon, Michael Heymann, and Petra Schwillie. Bidirectional ftsz  
434 filament treadmill promotes membrane constriction via torsional stress. bioRxiv, page 587790, 2019.
- 435 [21] Marijn GJ Ford, Simon Jenni, and Jodi Nunnari. The crystal structure of dynamin. Nature, 477(7366):561,  
436 2011.
- 437 [22] Julien Guizetti, Lothar Schermelleh, Jana Mäntler, Sandra Maar, Ina Poser, Heinrich Leonhardt, Thomas  
438 Müller-Reichert, and Daniel W Gerlich. Cortical constriction during abscission involves helices of escrt-iii-  
439 dependent filaments. Science, 331(6024):1616–1620, 2011.
- 440 [23] Sandrine Morlot, Valentina Galli, Marius Klein, Nicolas Chiaruttini, John Manzi, Frédéric Humbert, Luis  
441 Dinis, Martin Lenz, Giovanni Cappello, and Aurélien Roux. Membrane shape at the edge of the dynamin  
442 helix sets location and duration of the fission reaction. Cell, 151(3):619–629, 2012.
- 443 [24] Aurélien Roux, Katherine Uyhazi, Adam Frost, and Pietro De Camilli. Gtp-dependent twisting of dynamin  
444 implicates constriction and tension in membrane fission. Nature, 441(7092):528, 2006.

- 445 [25] Dganit Danino, Kwan-Hoon Moon, and Jenny E Hinshaw. Rapid constriction of lipid bilayers by the  
446 mechanochemical enzyme dynamin. Journal of structural biology, 147(3):259–267, 2004.
- 447 [26] Martin Lenz, Sandrine Morlot, and Aurélien Roux. Mechanical requirements for membrane fission: common  
448 facts from various examples. FEBS letters, 583(23):3839–3846, 2009.
- 449 [27] Diane S Lidke and Keith A Lidke. Advances in high-resolution imaging–techniques for three-dimensional  
450 imaging of cellular structures. J Cell Sci, 125(11):2571–2580, 2012.
- 451 [28] Wolfgang Helfrich. Elastic properties of lipid bilayers: theory and possible experiments. Zeitschrift für  
452 Naturforschung C, 28(11-12):693–703, 1973.
- 453 [29] Achim Guckenberger and Stephan Gekle. Theory and algorithms to compute helfrich bending forces: a  
454 review. J. Phys. Condens. Matter, 29(20):203001, May 2017.
- 455 [30] Morgan Chabanon and Padmini Rangamani. Gaussian curvature directs the distribution of spontaneous cur-  
456 vature on bilayer membrane necks. Soft matter, 14(12):2281–2294, 2018.
- 457 [31] Michael M Kozlov. Dynamin: possible mechanism of “pinchase” action. Biophysical journal, 77(1):604–616,  
458 1999.
- 459 [32] Michael M Kozlov. Fission of biological membranes: interplay between dynamin and lipids. Traffic, 2(1):51–  
460 65, 2001.
- 461 [33] Michael M Kozlov, Harvey T McMahon, and Leonid V Chernomordik. Protein-driven membrane stresses in  
462 fusion and fission. Trends in biochemical sciences, 35(12):699–706, 2010.
- 463 [34] Yonathan Kozlovsky and Michael M Kozlov. Membrane fission: model for intermediate structures.  
464 Biophysical journal, 85(1):85–96, 2003.
- 465 [35] Nikhil Walani, Jennifer Torres, and Ashutosh Agrawal. Endocytic proteins drive vesicle growth via instability  
466 in high membrane tension environment. Proceedings of the National Academy of Sciences, 112(12):E1423–  
467 E1432, 2015.
- 468 [36] Ehsan Irajizad, Rajesh Ramachandran, and Ashutosh Agrawal. Geometric instability catalyzes mitochondrial  
469 fission. Molecular biology of the cell, 30(1):160–168, 2019.
- 470 [37] Pannuzzo Martina, Zachary A McDargh, and Markus Deserno. The role of scaffold reshaping and disassembly  
471 in dynamin driven membrane fission. eLife, 7, 2018.

- 472 [38] Jenny E Hinshaw and Sandra L Schmid. Dynamin self-assembles into rings suggesting a mechanism for  
473 coated vesicle budding. Nature, 374(6518):190, 1995.
- 474 [39] J. Austin Cottrell, Thomas J. R. Hughes, and Yuri Bazilevs. Isogeometric Analysis. John Wiley & Sons, Ltd,  
475 2009.
- 476 [40] Roger Sauer, Thang Duong, Kranthi Mandadapu, and David Steigmann. A stabilized finite element formu-  
477 lation for liquid shells and its application to lipid bilayers. Journal of Computational Physics, 330:436–466,  
478 2017.
- 479 [41] Takuma Kishimoto, Yidi Sun, Christopher Buser, Jian Liu, Alphée Michelot, and David G Drubin. Deter-  
480 minants of endocytic membrane geometry, stability, and scission. Proceedings of the National Academy of  
481 Sciences, 108(44):E979–E988, 2011.
- 482 [42] EA Evans and R Skalak. Mechanics and thermodynamics of biomembranes: part 1. CRC critical reviews in  
483 bioengineering, 3(3):181–330, 1979.
- 484 [43] Padmini Rangamani, Kranthi K Mandadap, and George Oster. Protein-induced membrane curvature alters  
485 local membrane tension. Biophysical journal, 107(3):751–762, 2014.
- 486 [44] DJ Steigmann. Fluid films with curvature elasticity. Archive for Rational Mechanics and Analysis,  
487 150(2):127–152, 1999.
- 488 [45] Padmini Rangamani, Ashutosh Agrawal, Kranthi K Mandadapu, George Oster, and David J Steigmann. Inter-  
489 action between surface shape and intra-surface viscous flow on lipid membranes. Biomechanics and modeling  
490 in mechanobiology, 12(4):833–845, 2013.
- 491 [46] Marino Arroyo and Antonio DeSimone. Relaxation dynamics of fluid membranes. Physical Review E,  
492 79(3):031915, 2009.
- 493 [47] Mijo Simunovic, Jean-Baptiste Manneville, Henri-François Renard, Emma Evergren, Krishnan Raghunathan,  
494 Dhiraj Bhatia, Anne K Kenworthy, Gregory A Voth, Jacques Prost, Harvey T McMahon, et al. Friction  
495 mediates scission of tubular membranes scaffolded by bar proteins. Cell, 170(1):172–184, 2017.
- 496 [48] François Quemeneur, Jon K Sigurdsson, Marianne Renner, Paul J Atzberger, Patricia Bassereau, and David  
497 Lacoste. Shape matters in protein mobility within membranes. Proceedings of the National Academy of  
498 Sciences, 111(14):5083–5087, 2014.
- 499 [49] Mohammad Rahimi and Marino Arroyo. Shape dynamics, lipid hydrodynamics, and the complex viscoelas-  
500 ticity of bilayer membranes. Physical Review E, 86(1):011932, 2012.

- 501 [50] Ashutosh Agrawal and David J Steigmann. Modeling protein-mediated morphology in biomembranes.  
502 Biomechanics and modeling in mechanobiology, 8(5):371–379, 2009.
- 503 [51] Jon Mulholland, Daphne Preuss, Anne Moon, Amie Wong, David Drubin, and David Botstein. Ultrastructure  
504 of the yeast actin cytoskeleton and its association with the plasma membrane. The Journal of cell biology,  
505 125(2):381–391, 1994.
- 506 [52] Jianwu Dai, Michael P Sheetz, Xiaodong Wan, and Catherine E Morris. Membrane tension in swelling and  
507 shrinking molluscan neurons. Journal of Neuroscience, 18(17):6681–6692, 1998.
- 508 [53] Rumiana Dimova. Recent developments in the field of bending rigidity measurements on membranes.  
509 Advances in colloid and interface science, 208:225–234, 2014.
- 510 [54] Lawrence F Shampine, Jacek Kierzenka, and Mark W Reichelt. Solving boundary value problems for ordinary  
511 differential equations in matlab with bvp4c. Tutorial notes, 2000:1–27, 2000.
- 512 [55] Panchapakesan Venkataraman. Applied optimization with MATLAB programming. John Wiley & Sons,  
513 2009.
- 514 [56] Ashutosh Agrawal and David J Steigmann. Boundary-value problems in the theory of lipid membranes.  
515 Continuum Mechanics and Thermodynamics, 21(1):57–82, 2009.
- 516 [57] Lisandro Dalcin, Nathaniel Collier, Philippe Vignal, AMA Côrtes, and Victor M Calo. Petiga: A framework  
517 for high-performance isogeometric analysis. Computer Methods in Applied Mechanics and Engineering,  
518 308:151–181, 2016.
- 519 [58] V. V Novozilov. The theory of thin shells. Noordhoff Ltd., 1959.
- 520 [59] Imre Derényi, Frank Jülicher, and Jacques Prost. Formation and interaction of membrane tubes. Physical  
521 review letters, 88(23):238101, 2002.
- 522 [60] Eyas Azzuni and Sukru Guzey. A perturbation approach on buckling and postbuckling of circular rings under  
523 nonuniform loads. International Journal of Mechanical Sciences, 137:86 – 95, 2018.
- 524 [61] T. Rahman, E. L. Jansen, and Z. Gürdal. Dynamic buckling analysis of composite cylindrical shells using a  
525 finite element based perturbation method. Nonlinear Dynamics, 66(3):389–401, Nov 2011.
- 526 [62] R Von Mises. Der kritische aussendruck für allseits belastete zylindrische rohre, fest zum 70, gerburtstag von  
527 prof. dr. a. stodola, zürich (1929). Translated and annotated by Windenburg, DF, pages 418–30, 1936.

- 528 [63] Dwight F Windenburg. Collapse by instability of thin cylindrical shells under external pressure. Transactions  
529 of The American Society of Mechanical Engineers, 56(11), 1934.
- 530 [64] Thein Wah. Buckling of thin circular rings under uniform pressure. International Journal of Solids and  
531 Structures, 3(6):967–974, 1967.
- 532 [65] Pavel Kozlovsky, Uri Zaretsky, Ariel J Jaffa, and David Elad. General tube law for collapsible thin and  
533 thick-wall tubes. Journal of biomechanics, 47(10):2378–2384, 2014.
- 534 [66] Andrew L Hazel and Tom Mullin. On the buckling of elastic rings by external confinement. Philosophical  
535 Transactions of the Royal Society A: Mathematical, Physical and Engineering Sciences, 375(2093):20160227,  
536 2017.
- 537 [67] E Azzuni and S Guzey. Behavior of thin elastic circular rings with large deformations under nonuniform  
538 loads. Journal of Pressure Vessel Technology, 141(1):011201, 2019.
- 539 [68] Carl Ross, Andrew Little, Daniel Short, and G Brown. Inelastic buckling of geometrically imperfect tubes  
540 under external hydrostatic pressure. Journal of Ocean Technology, 3(1):75–90, 2008.
- 541 [69] James H Hurley and Phyllis I Hanson. Membrane budding and scission by the ESCRT machinery: it’s all in  
542 the neck. Nature reviews. Molecular cell biology, 11(8):556–66, 2010.
- 543 [70] Pavel V. Bashkirov, Sergey A. Akimov, Alexey I. Evseev, Sandra L. Schmid, Joshua Zimmerberg, and  
544 Vadim A. Frolov. GTPase Cycle of Dynamin Is Coupled to Membrane Squeeze and Release, Leading to  
545 Spontaneous Fission. Cell, 135(7):1276–1286, 2008.
- 546 [71] Juha-Pekka Mattila, Anna V Shnyrova, Anna C Sundborger, Eva Rodriguez Hortelano, Marc Fuhrmans,  
547 Sylvia Neumann, Marcus Müller, Jenny E Hinshaw, Sandra L Schmid, and Vadim A Frolov. A hemi-fission  
548 intermediate links two mechanistically distinct stages of membrane fission. Nature, 524(7563):109, 2015.
- 549 [72] Alain Goriely and Sébastien Neukirch. Mechanics of climbing and attachment in twining plants. Physical  
550 review letters, 97(18):184302, 2006.
- 551 [73] Sandrine Isnard, Alexander R Cobb, N Michele Holbrook, Maciej Zwieniecki, and Jacques Dumais. Ten-  
552 sioning the helix: A mechanism for force generation in twining plants. Proceedings of the Royal Society B:  
553 Biological Sciences, 276(1667):2643–2650, 2009.
- 554 [74] Ravindra Kempaiah and Zhihong Nie. From nature to synthetic systems: shape transformation in soft mate-  
555 rials. Journal of Materials Chemistry B, 2(17):2357–2368, 2014.

- 556 [75] Alexandre Grassart, Aaron T Cheng, Sun Hae Hong, Fan Zhang, Nathan Zenzer, Yongmei Feng, David M  
557 Briner, Gregory D Davis, Dmitry Malkov, and David G Drubin. Actin and dynamin2 dynamics and interplay  
558 during clathrin-mediated endocytosis. J Cell Biol, 205(5):721–735, 2014.
- 559 [76] Anna V Shnyrova, Pavel V Bashkirov, Sergey A Akimov, Thomas J Pucadyil, Joshua Zimmerberg, Sandra L  
560 Schmid, and Vadim A Frolov. Geometric catalysis of membrane fission driven by flexible dynamin rings.  
561 Science, 339(6126):1433–1436, 2013.
- 562 [77] Joshua S Chappie, Jason A Mears, Shunming Fang, Marilyn Leonard, Sandra L Schmid, Ronald A Milligan,  
563 Jenny E Hinshaw, and Fred Dyda. A pseudoatomic model of the dynamin polymer identifies a hydrolysis-  
564 dependent powerstroke. Cell, 147(1):209–222, 2011.
- 565 [78] Nikolaus Pawlowski. Dynamin self-assembly and the vesicle scission mechanism: How dynamin oligomers  
566 cleave the membrane neck of clathrin-coated pits during endocytosis. Bioessays, 32(12):1033–1039, 2010.
- 567 [79] Shikai Deng and Vikas Berry. Wrinkled, rippled and crumpled graphene: an overview of formation mecha-  
568 nism, electronic properties, and applications. Materials Today, 19(4):197 – 212, 2016.
- 569 [80] Andrew L Hazel and Matthias Heil. Surface-tension-induced buckling of liquid-lined elastic tubes: a model  
570 for pulmonary airway closure. Proceedings of the Royal Society A: Mathematical, Physical and Engineering  
571 Sciences, 461(2058):1847–1868, 2005.
- 572 [81] Miha Brojan, A Puksic, and Franc Kosel. Buckling and post-buckling of a nonlinearly elastic col-  
573 umn. ZAMM-Journal of Applied Mathematics and Mechanics/Zeitschrift für Angewandte Mathematik und  
574 Mechanik: Applied Mathematics and Mechanics, 87(7):518–527, 2007.
- 575 [82] Elena Ingerman, Edward M Perkins, Michael Marino, Jason A Mears, J Michael McCaffery, Jenny E Hin-  
576 shaw, and Jodi Nunnari. Dnm1 forms spirals that are structurally tailored to fit mitochondria. J Cell Biol,  
577 170(7):1021–1027, 2005.
- 578 [83] Masaru Fujimoto, Shin-ichi Arimura, Takashi Ueda, Hideki Takanashi, Yoshikazu Hayashi, Akihiko Nakano,  
579 and Nobuhiro Tsutsumi. Arabidopsis dynamin-related proteins drp2b and drp1a participate together in  
580 clathrin-coated vesicle formation during endocytosis. Proceedings of the National Academy of Sciences,  
581 107(13):6094–6099, 2010.
- 582 [84] Sarah E Palmer, Iwona I Smaczynska-de Rooij, Christopher J Marklew, Ellen G Allwood, Ritu Mishra,  
583 Simeon Johnson, Martin W Goldberg, and Kathryn R Ayscough. A dynamin-actin interaction is required  
584 for vesicle scission during endocytosis in yeast. Current Biology, 25(7):868–878, 2015.

- 585 [85] Marcus J Taylor, Marko Lampe, and Christien J Merrifield. A feedback loop between dynamin and actin  
586 recruitment during clathrin-mediated endocytosis. PLoS biology, 10(4):e1001302, 2012.
- 587 [86] Sean D Conner and Sandra L Schmid. Regulated portals of entry into the cell. Nature, 422(6927):37–44,  
588 2003.
- 589 [87] Thomas J Pucadyil and Sandra L Schmid. Real-time visualization of dynamin-catalyzed membrane fission  
590 and vesicle release. Cell, 135(7):1263–1275, 2008.
- 591 [88] Aurélien Roux, Gerbrand Koster, Martin Lenz, Benoît Sorre, Jean-Baptiste Manneville, Pierre Nassoy, and  
592 Patricia Bassereau. Membrane curvature controls dynamin polymerization. Proceedings of the National  
593 Academy of Sciences, 107(9):4141–4146, 2010.
- 594 [89] Rajesh Ramachandran and Sandra L Schmid. Real-time detection reveals that effectors couple dynamin’s  
595 gtp-dependent conformational changes to the membrane. The EMBO journal, 27(1):27–37, 2008.
- 596 [90] Srishti Dar, Sukrut C Kamerkar, and Thomas J Pucadyil. A high-throughput platform for real-time analysis  
597 of membrane fission reactions reveals dynamin function. Nature cell biology, 17(12):1588, 2015.
- 598 [91] Wanda Kukulski, Martin Schorb, Marko Kaksonen, and John A G Briggs. Plasma membrane reshaping during  
599 endocytosis is revealed by time-resolved electron tomography. Cell, 150(3):508–520, 2012.
- 600 [92] Il-Hyung Lee, Hiroyuki Kai, Lars-Anders Carlson, Jay T Groves, and James H Hurley. Negative mem-  
601 brane curvature catalyzes nucleation of endosomal sorting complex required for transport (escrt)-iii assembly.  
602 Proceedings of the National Academy of Sciences, 112(52):15892–15897, 2015.
- 603 [93] Shawn Ferguson, Andrea Raimondi, Summer Paradise, Hongying Shen, Kumi Mesaki, Agnes Ferguson,  
604 Olivier Destaing, Genevieve Ko, Junko Takasaki, Ottavio Cremona, et al. Coordinated actions of actin and  
605 bar proteins upstream of dynamin at endocytic clathrin-coated pits. Developmental cell, 17(6):811–822, 2009.
- 606 [94] Winfried Römer, Léa-Laetitia Pontani, Benoît Sorre, Carles Rentero, Ludwig Berland, Valérie Chambon,  
607 Christophe Lamaze, Patricia Bassereau, Cécile Sykes, Katharina Gaus, et al. Actin dynamics drive membrane  
608 reorganization and scission in clathrin-independent endocytosis. Cell, 140(4):540–553, 2010.
- 609 [95] David Taylor and Jan-Henning Dirks. Shape optimization in exoskeletons and endoskeletons: a biomechanics  
610 analysis. Journal of the Royal Society Interface, 9(77):3480–3489, 2012.
- 611 [96] Drazen Raucher and Michael P Sheetz. Characteristics of a membrane reservoir buffering membrane tension.  
612 Biophysical journal, 77(4):1992–2002, 1999.
- 613 [97] R. Vasan. Membrane-neck-formation. <https://github.com/ritvikvasan/Membrane-neck-formation>, 2019.

- 614 [98] Roger A Sauer and Thang X Duong. On the theoretical foundations of thin solid and liquid shells.  
615 Mathematics and Mechanics of Solids, 22(3):343–371, 2017.
- 616 [99] S. Rudraraju. Code repository for kirchhoff-love shell kinematics and applications to mechanics of biological  
617 membranes. <https://github.com/cmmg/biologicalMembraneMechanics>, 2019.



## 618 **Supplementary Online Material**

### 619 **Assumptions**

- 620 • The lipid bilayer is modeled as a thin elastic shell. We use the Helfrich energy [28] based on the assumption that the thickness of the bilayer is negligible compared to its radius of curvature. This allows us to neglect shear deformations and consider classical Kirchhoff-Love shell kinematics for thin shell geometries. 621  
622 Furthermore, we assume that the membrane is areally incompressible since the maximum elastic stretch is only 4 % [42]. This incompressibility constraint is numerically enforced using a Lagrange multiplier field. 623  
624 Additionally, we ignore any fluid [45] and friction [47] properties of the bilayer. Thus, the membrane is in mechanical equilibrium at all times. 625  
626
- 627 • The lack of resistance to shear deformation modes in the Helfrich energy formulation can result in rigid body (zero energy) modes of deformation. To circumvent this limitation, in the 3D numerical simulations, we add shear stabilization terms to the classical Helfrich energy functional [40]. These stabilization terms are of 628  
629 a smaller magnitude relative to the traditional bending energy terms, and restore stability to the numerical model without significantly affecting the kinematics of bending. 630  
631
- 632 • The membrane tubule is modeled both as an axisymmetric and 3D lipid bilayer. A pinching force is applied at different locations - ‘cap’, ‘tube’, and ‘base’ (Fig. 2). Since the tether is pulled from a membrane reservoir that can buffer changes in membrane tension [51, 96], we assume that elastic properties like membrane 633  
634 tension and bending rigidity are constant. 635
- 636 • Since we do not consider the fluid properties of the membrane, we cannot consider scission explicitly. We assume that the large stresses at the neck can lead to the formation of a hemi-fission intermediate [32, 35]. 637
- 638 • The interaction of the constriction proteins and the membrane tubule can be numerically thought of as a contact model where the proteins apply a contact force of constriction on the tubule. Here, we do not 639  
640 consider a contact model but rather apply a follower load type collar pressure in the constriction region.

### 641 **Thin shell formulations: Axisymmetric and 3D models**

#### 642 **Equilibrium equations for the axisymmetric model**

643 First, we write the force balance on the membrane as

$$\nabla \cdot \boldsymbol{\sigma} + p\mathbf{n} = \mathbf{f}, \quad (3)$$

644 where  $\boldsymbol{\sigma}$  is the stress tensor,  $p$  is the pressure difference between the inside and outside of the volume bounded by  
 645 the membrane, and  $\mathbf{f}$  is any externally applied force per unit area on the membrane. In our simulations, we assume  
 646 that the tubule has equilibrated the pressure difference, and thus set  $p$  to 0.  $\mathbf{f}$  includes both the axial and pinching  
 647 forces applied on the membrane. By introducing the covariant derivative as  $(\cdot)_{;\alpha}$ , the surface divergence in Eq. 3  
 648 can be rewritten as [44]

$$\nabla \cdot \boldsymbol{\sigma} = \boldsymbol{\sigma}^{\alpha}_{;\alpha} = (\sqrt{a})^{-1}(\sqrt{a}\boldsymbol{\sigma}^{\alpha})_{,\alpha}, \quad (4)$$

649 where  $a$  is the determinant of the first fundamental form metric  $a_{\alpha\beta}$ . The surface stresses in Eq. 3 can be split into  
 650 normal and tangential component given by

$$\boldsymbol{\sigma}^{\alpha} = \mathbf{T}^{\alpha} + S^{\alpha}\mathbf{n}, \quad (5)$$

651 where

$$\mathbf{T}^{\alpha} = T^{\alpha\beta}\mathbf{a}_{\beta}, \quad T^{\alpha\beta} = \sigma^{\alpha\beta} + b_{\mu}^{\beta}M^{\mu\alpha}, \quad S^{\alpha} = -M^{\alpha\beta}_{;\beta}. \quad (6)$$

652 The two tensors  $\sigma^{\alpha\beta}$  and  $M^{\alpha\beta}$  can be expressed by the derivative of  $F$ , the energy per unit mass, with respect to  
 653 the coefficients of the first and second fundamental forms,  $a_{\alpha\beta}$ ,  $b_{\alpha\beta}$ , respectively [44, 45]

$$\sigma^{\alpha\beta} = \rho \left( \frac{\partial F(\rho, H, K; x^{\alpha})}{\partial a_{\alpha\beta}} + \frac{\partial F(\rho, H, K; x^{\alpha})}{\partial a_{\beta\alpha}} \right), \quad (7)$$

$$M^{\alpha\beta} = \frac{\rho}{2} \left( \frac{\partial F(\rho, H, K; x^{\alpha})}{\partial b_{\alpha\beta}} + \frac{\partial F(\rho, H, K; x^{\alpha})}{\partial b_{\beta\alpha}} \right), \quad (8)$$

654 where  $\rho$  is the surface mass density.  $H$  and  $K$  are mean and Gaussian curvatures given by

$$H = \frac{1}{2}a^{\alpha\beta}b_{\alpha\beta}, \quad K = \frac{1}{2}\varepsilon^{\alpha\beta}\varepsilon^{\lambda\mu}b_{\alpha\lambda}b_{\beta\mu}. \quad (9)$$

655 Here  $(a^{\alpha\beta}) = (a_{\alpha\beta})$  is the dual metric and  $\varepsilon^{\alpha\beta}$  is the permutation tensor defined by  $\varepsilon^{12} = -\varepsilon^{21} = \frac{1}{\sqrt{a}}$ ,  $\varepsilon^{11} =$   
 656  $\varepsilon^{22} = 0$ .

657 A reasonable assumption to make is that the membrane tubule has a fixed area. We introduce an area incompress-  
 658 ibility ( $J = 1$ ) constraint using a general form of free energy density per unit mass given as

$$F(\rho, H, K; x^\alpha) = \tilde{F}(H, K; x^\alpha) - \frac{\gamma(x^\alpha, t)}{\rho}. \quad (10)$$

659 Here  $\gamma(x^\alpha, t)$  is a Lagrange multiplier field required to impose invariance of  $\rho$  on the whole of the surface (see [44])  
 660 for full derivation). Substituting  $W = \rho\tilde{F}$  into Eq. 10 we get

$$\sigma^{\alpha\beta} = (\lambda + W)a^{\alpha\beta} - (2HW_H + 2\kappa W_K)a^{\alpha\beta} + W_H\tilde{b}^{\alpha\beta}, \quad (11)$$

$$M^{\alpha\beta} = \frac{1}{2}W_H a^{\alpha\beta} + W_K\tilde{b}^{\alpha\beta}, \quad (12)$$

661 where

$$\lambda = -(\gamma + W). \quad (13)$$

662 Combining Eqs. 12, 6, and 5 into Eq. 3 gives the equations in normal and tangential equations as

$$p + \mathbf{f} \cdot \mathbf{n} = \Delta \frac{1}{2}W_H + (W_K)_{;\alpha\beta}\tilde{b}^{\alpha\beta} + W_H(2H^2 - K) \\ + 2H(KW_K - W) - 2\lambda H, \quad (14)$$

663 and

$$N_{;\alpha}^{\beta\alpha} - S^{\alpha}b_{\alpha}^{\beta} = -(\gamma_{,\alpha} + W_K k_{,\alpha} + W_H H_{,\alpha})a^{\beta\alpha} \\ = \left( \frac{\partial W}{\partial x_{|exp}^{\alpha}} + \lambda_{,\alpha} \right) a^{\beta\alpha} = \mathbf{f} \cdot \mathbf{a}_s. \quad (15)$$

664 Here  $\Delta(\cdot)$  is the surface Laplacian and  $(\cdot)_{|exp}$  denotes the explicit derivative respect to coordinate  $\theta^\alpha$ .

## 665 Axisymmetric model

666 Using the axisymmetric parametrization

$$\mathbf{r}(s, \theta) = r(s)\mathbf{e}_r(\theta) + z(s)\mathbf{k}. \quad (16)$$

667 we define  $\psi$  as the angle made by the tangent with respect to the horizontal (see Fig. 1). This gives  $r'(s) =$   
 668  $\cos(\psi)$ ,  $z'(s) = \sin(\psi)$ , which satisfies the identity  $(r')^2 + (z')^2 = 1$ . Using this, we define the normal to  
 669 the surface as  $\mathbf{n} = -\sin \psi \mathbf{e}_r(\theta) + \cos \psi \mathbf{k}$ , the tangent to the surface in the direction of increasing arc length as  
 670  $\mathbf{a}_s = \cos \psi \mathbf{e}_r(\theta) + \sin \psi \mathbf{k}$ , and unit vector  $\tau = \mathbf{e}_\theta$  tangent to the boundary  $\partial\omega$  in the direction of the surface of  
 671 revolution. For more details, we refer the reader to [9, 43, 44].

672 The expressions for tangential ( $\kappa_\nu$ ), transverse ( $\kappa_\tau$ ) and twist ( $\tau$ ) curvatures are simplified as

$$\kappa_\nu = \psi', \quad \kappa_\tau = r^{-1} \sin \psi, \quad \tau = 0. \quad (17)$$

673 Further, we calculate the mean curvature ( $H$ ) and Gaussian curvature ( $K$ ) as

$$H = \frac{1}{2}(\kappa_\nu + \kappa_\tau) = \frac{1}{2}(\psi' + r^{-1} \sin \psi), \quad K = \kappa_\tau \kappa_\nu = \frac{\psi' \sin \psi}{r}. \quad (18)$$

674 We introduce a term  $L = \frac{1}{2\kappa} r (W_H)'$  in order to write a system of first order differential equations governing the  
 675 problem [9] as ,

$$\begin{aligned} r' &= \cos \psi, & z' &= \sin \psi, \\ r\psi' &= 2rH - \sin \psi, & rH' &= L + rC', \\ \frac{L'}{r} &= \frac{p}{k} + \frac{\mathbf{f} \cdot \mathbf{n}}{\kappa} + 2H \left[ (H - C)^2 + \frac{\lambda}{\kappa} \right] \\ &\quad - 2(H - C) \left[ H^2 + (H - r^{-1} \sin \psi)^2 \right], \\ \lambda' &= 2\kappa(H - C)C' - \mathbf{f} \cdot \mathbf{a}_s. \end{aligned} \quad (19)$$

676 Eq. 19 is a function of the arc length ( $s$ ). This can be rewritten in terms of membrane area ( $a$ ) using

$$a(s) = 2\pi \int_0^s r(\xi) d\xi \quad \rightarrow \quad \frac{da}{ds} = 2\pi r. \quad (20)$$

677 We choose to non-dimensionalize our system of equations using a length scale  $R_0$  and bending rigidity scale  $\kappa_0$  as

$$\begin{aligned} \alpha &= \frac{a}{2\pi R_0^2}, & x &= \frac{r}{R_0}, & y &= \frac{y}{R_0}, & h &= HR_0, & c &= CR_0, & l &= LR_0, \\ \lambda^* &= \frac{\lambda R_0^2}{\kappa_0}, & p^* &= \frac{p R_0^3}{\kappa_0}, & f^* &= \frac{f R_0^3}{\kappa_0}, & \kappa^* &= \frac{\kappa}{\kappa_0}, \end{aligned} \quad (21)$$

678 where  $R_0$  is the radius of the flat patch of membrane in simulations of a membrane tubule (Fig. 2E), the radius of  
679 the hemisphere for simulations of the tubule cap (Fig. 2B), and the radius of the tube for simulations of the tube  
680 (Fig. 2C) and the base (Fig. 2D).  $\kappa_0$  is the bending rigidity of the bare membrane.

681 Rewriting Eq. 19 using the dimensionless variables in Eq. 21, we get [9]

$$\begin{aligned} x\dot{x} &= \cos \psi, & x\dot{y} &= \sin \psi, \\ x^2\dot{\psi} &= 2x\dot{h} - \sin \psi, & x^2\dot{h} &= l + x^2\dot{c}, \\ \dot{i} &= \frac{p^*}{\kappa^*} + \frac{\mathbf{f}^* \cdot \mathbf{n}}{\kappa^*} + 2h \left[ (h-c)^2 + \frac{\lambda^*}{\kappa^*} \right] \\ &\quad - 2(h-c) \left[ h^2 + (h - x^{-1} \sin \psi)^2 \right], \\ \dot{\lambda}^* &= 2\kappa^* (h-c) \dot{c} - \frac{\mathbf{f}^* \cdot \mathbf{a}_s}{x}. \end{aligned} \quad (22)$$

682 We enforce a third boundary point for constriction simulations at the base (Fig. 2D) and the whole tube (Fig. 2E)  
683 by introducing an independent variable [54]

$$\zeta = \alpha_{bp} \frac{\alpha - \alpha_{bp}}{\alpha_{tot} - \alpha_{bp}}, \quad (23)$$

684 where  $\alpha_{bp}$  is the non-dimensional area of the first ‘phase’ and  $\alpha_{tot}$  is the total non-dimensional area of the mem-  
685 brane.  $\alpha$  is the variable defining the non-dimensional area along the first ‘phase’ and  $\zeta$  is the variable defining  
686 non-dimensional area along the second ‘phase’. Like  $\alpha$  in the first interval,  $\zeta$  ranges from 0 to  $\alpha_{bp}$  in the second  
687 interval. Thus we can redefine our system of equations (Eq. 22) for 2 phases as

$$\begin{aligned}
 x_1 \frac{dx_1}{d\alpha} &= \cos \psi_1, & x_1 \frac{dy_1}{d\alpha} &= \sin \psi_1, \\
 x_1^2 \frac{d\psi_1}{d\alpha} &= 2x_1 h_1 - \sin \psi_1, & x_1^2 \frac{dh_1}{d\alpha} &= l_1 + x_1^2 \dot{c}_1, \\
 \frac{dl_1}{d\alpha} &= \frac{p^*}{\kappa^*} + \frac{\mathbf{f}_1^* \cdot \mathbf{n}}{\kappa^*} + 2h_1 \left[ (h_1 - c)^2 + \frac{\lambda_1^*}{\kappa^*} \right] \\
 &\quad - 2(h_1 - c_1) \left[ h_1^2 + (h_1 - x_1^{-1} \sin \psi_1)^2 \right], \\
 \frac{d\lambda_1^*}{d\alpha} &= 2\kappa^* (h_1 - c_1) \dot{c}_1 - \frac{\mathbf{f}_1^* \cdot \mathbf{a}_s}{x}, \\
 x_2 \frac{dx_2}{d\zeta} &= \left( \frac{\alpha_{tot} - \alpha_{bp}}{\alpha_{bp}} \right) \cos \psi_2, & x_2 \frac{dy_2}{d\zeta} &= \left( \frac{\alpha_{tot} - \alpha_{bp}}{\alpha_{bp}} \right) \sin \psi_2, \\
 x_2^2 \frac{d\psi_2}{d\alpha} &= \left( \frac{\alpha_{tot} - \alpha_{bp}}{\alpha_{bp}} \right) (2x_2 h_2 - \sin \psi_2), \\
 x_2^2 \frac{dh_2}{d\zeta} &= \left( \frac{\alpha_{tot} - \alpha_{bp}}{\alpha_{bp}} \right) (l_2 + x_2^2) \dot{c}_2, \\
 \frac{dl_2}{d\zeta} &= \left( \frac{\alpha_{tot} - \alpha_{bp}}{\alpha_{bp}} \right) \left( \frac{p^*}{\kappa^*} + \frac{\mathbf{f}_2^* \cdot \mathbf{n}}{\kappa^*} + 2h_2 \left[ (h_2 - c_2)^2 + \frac{\lambda_2^*}{\kappa^*} \right] \right) \\
 &\quad - 2(h_2 - c_2) \left[ h_2^2 + (h_2 - x_2^{-1} \sin \psi_2)^2 \right], \\
 \frac{d\lambda_2^*}{d\zeta} &= \left( \frac{\alpha_{tot} - \alpha_{bp}}{\alpha_{bp}} \right) \left( 2\kappa^* (h_2 - c_2) \dot{c}_2 - \frac{\mathbf{f}_2^* \cdot \mathbf{a}_s}{x} \right), \tag{24}
 \end{aligned}$$

688 where 1 and 2 are the two phases represented by non-dimensional areas  $\alpha$  and  $\zeta$ , both of which are defined in the  
 689 interval  $[0, \alpha_{bp}]$ . Applied forces are modeled as a smooth hyperbolic tangent function. For example, the axial force  
 690 at the tip of the tubule and radial force at the interface are modeled as

$$f_{axial} = f_{ax} \times (0.5(1 - \tanh(g * (\alpha - \alpha_{axial})))) / \alpha_{axial}, \tag{25}$$

$$\begin{aligned}
 f_{pinch} &= f_p \times 0.5(\tanh(g(\alpha - (\alpha_{bp} - \alpha_{radial}))) \\
 &\quad - 0.5 \tanh(g(\alpha - \alpha_{bp}))), \tag{26}
 \end{aligned}$$

691 where  $f_{axial}$  and  $f_{pinch}$  are the distribution of axial and radial forces per unit area along the non-dimensional  
 692 membrane area  $\alpha$ ,  $f_{ax}$  and  $f_p$  are the magnitudes for force per unit area, and  $\alpha_{axial}$  and  $\alpha_{radial}$  are the corresponding  
 693 non-dimensional areas of applied force in the axial and radial direction respectively.  $g$  is a constant that ensures a  
 694 sharp but smooth transition. In our simulations, we use  $g = 20$  [9].

## 695 **Boundary conditions**

696 Eq 24 can be solved given a set of boundary conditions. All the axisymmetric simulations in this study were  
 697 performed using the MATLAB bvp4c toolbox [54]. A useful feature of this toolbox is the estimation of unknown

698 parameters by providing additional boundary conditions [54]. The MATLAB subroutines used in this work are  
699 available on Github [97].

700 • **Whole tubule**

701 The tubule pinching simulations in Fig. 2E were performed using the following set of boundary conditions

$$\begin{aligned}
 x_1(0) &= 0, & x_1(\alpha_{bp}) &= \mathbf{x}_p, & \psi_1(0) &= 0, & \psi_2(\alpha_{bp}) &= 0, \\
 y_1(0) &= \mathbf{y}_p, & y_2(\alpha_{bp}) &= 0, & \lambda_2(\alpha_{bp}) &= \lambda_0, & l_1(0) &= 0, \\
 x_1(\alpha_{bp}) &= x_2(0), & y_1(\alpha_{bp}) &= y_2(0), & \psi_1(\alpha_{bp}) &= \psi_2(0), \\
 h_1(\alpha_{bp}) &= h_2(0), & l_1(\alpha_{bp}) &= l_2(0), & \lambda_1(\alpha_{bp}) &= \lambda_2(0).
 \end{aligned} \tag{27}$$

702  $\mathbf{x}_p$  and  $\mathbf{y}_p$  are additional constraints for the radius at the interface and height of the tubule respectively.  
703 These additional constraints are used to estimate the axial force and pinching force required to obtain a  
704 solution to the system of equations in Eq. 24.  $\lambda_0$  is the boundary membrane tension. We note here that this  
705 now represents a system of 12 equations and 2 unknown parameters with 14 boundary conditions. The 2  
706 unknown parameters are the axial and radial force. 6 of these boundary conditions are continuity conditions  
707 for every parameter at the interface (Eq. 27).

708 • **Base**

709 The half catenoid-like base pinching simulations in Fig. 2D were performed using the following set of  
710 boundary conditions

$$\begin{aligned}
 x_1(0) &= \mathbf{x}_0, & x_1(\alpha_{bp}) &= \mathbf{x}_p, & \psi_1(0) &= \pi, & \psi_2(\alpha_{bp}) &= \pi/2, \\
 y_1(0) &= 0, & \lambda_1(0) &= \lambda_0, & l_2(\alpha_{bp}) &= 0, \\
 x_1(\alpha_{bp}) &= x_2(0), & y_1(\alpha_{bp}) &= y_2(0), & \psi_1(\alpha_{bp}) &= \psi_2(0), \\
 h_1(\alpha_{bp}) &= h_2(0), & l_1(\alpha_{bp}) &= l_2(0), & \lambda_1(\alpha_{bp}) &= \lambda_2(0).
 \end{aligned} \tag{28}$$

711  $\mathbf{x}_p$  is the additional constraint for the radius at the interface.  $\mathbf{x}_0$  is the radius at  $y = 0$ . The additional  
712 constraint is used to estimate the pinching force required to obtain a solution to the system of equations in  
713 Eq. 24.  $\lambda_0$  is the boundary membrane tension. We note here that this now represents a system of 12 equations  
714 and 1 unknown parameter with 13 boundary conditions.

715 • **Tube**

716 The cylinder/tube pinching simulations in Fig. 2C were performed by solving the system of equations in Eq.  
717 22 for a single phase of membrane. The boundary conditions used were

$$\begin{aligned}l(0) = 0, \quad y(0) = 0, \quad y(\alpha) = Z_0/R_0, \quad \psi(0) = \pi/2, \\x(\alpha) = 1, \quad x(0) = \mathbf{x}_p, \quad \psi(\alpha) = \pi/2,\end{aligned}\tag{29}$$

718 where  $\alpha$  is the non-dimensional area of the tube,  $\mathbf{x}_p$  is the additional constraint required for estimating  
719 the pinching force. This represents a system of 6 equations and 1 unknown parameter with 7 boundary  
720 conditions.

#### 721 • Cap

722 The hemisphere/cap pinching simulations in figure 2B were performed by solving the system of equations in  
723 Eq. 22 for a single phase of membrane. The boundary conditions used were

$$\begin{aligned}l(0) = 0, \quad y(0) = 0, \quad l(\alpha) = 0, \quad \psi(0) = \pi/2, \\x(\alpha) = 0, \quad x(0) = \mathbf{x}_p, \quad \psi(\alpha) = \pi,\end{aligned}\tag{30}$$

724 where  $\mathbf{x}_p$  is the additional constraint required for estimating the pinching force. This represents a system of  
725 6 equations and 1 unknown parameter with 7 boundary conditions.

## 726 3D model

### 727 Thin shell formulation

728 Considering the classical Helfrich formulation for biological membranes, the strain energy density of a membrane  
729 in the current configuration is given by:

$$W = k_B(H - H_0)^2 + k_G\kappa\tag{31}$$

730 where  $k_B$  and  $k_G$  are the bending modulus and the Gaussian modulus of the membrane,  $H$  is the mean curvature,  
731  $\kappa$  is the Gaussian curvature and  $H_0$  represents the instantaneous curvature induced in the membrane.

732 To enforce area-incompressibility, we consider the following Lagrange multiplier formulation:

$$W_{LM} = J(k_B(H - H_0)^2 + k_G\kappa) + q(J - 1)\tag{32}$$



733 where  $q$  is the point value of the Lagrange multiplier field, and  $J$  is the surface stretch (ratio of area in the current  
734 configuration to the area in the reference configuration).

735 The governing equation for quasi-static mechanical equilibrium in 3D simulations is obtained by minimizing the  
736 Helfrich energy functional following standard variational arguments, and is given by [40]:

$$\int_{\partial\Omega} \frac{1}{2} \delta a_{ij} \sigma^{ij} da + \int_{\partial\Omega} \delta b_{ij} M^{ij} da - \int_{\partial\Omega_{\text{collar}}} \delta \mathbf{x} \cdot \mathbf{p} da - \int_{\Gamma} \delta \mathbf{x} \cdot \mathbf{t} ds = 0 \quad (33)$$

737 where  $\partial\Omega$  is the membrane surface and  $\Gamma$  is the membrane boundary on which surface tractions can be applied, as  
738 shown in Figure 1B.  $\delta a_{ij}$  and  $\delta b_{ij}$  are variations of the components of the metric tensor and the curvature tensor,  
739 respectively.  $\sigma^{ij}$  are the components of the stress tensor,  $M^{ij}$  are components of the moment tensor,  $\mathbf{p}$  is the  
740 pressure applied along a collar on the membrane surface (to cause constriction), and  $\mathbf{t}$  is the surface traction.

741 For a hyperelastic material model, we can express the stress and moment components in terms of the strain energy  
742 density as [98]:

$$\sigma^{ij} = \frac{2}{J} \frac{\partial W}{\partial a_{ij}} \quad (34)$$

$$M^{ij} = \frac{1}{J} \frac{\partial W}{\partial b_{ij}} \quad (35)$$

For the Helfrich type strain energy density, these take the form:

$$\sigma^{ij} = (k_B(H - H_0)^2 - k_G \kappa) a^{ij} - 2k_B(H - H_0) b^{ij} \quad (36)$$

$$M^{ij} = (k_B(H - H_0) + 2k_G H) a^{ij} - k_G b^{ij} \quad (37)$$

## 743 Computational implementation

744 We solve the governing equation given by Eq.33 using a Isogeometric Analysis (IGA) based numerical frame-  
745 work for solving problems of membrane mechanics developed as part of this work. A companion manuscript (in  
746 preparation by the authors) describes the details of the mathematical methods and the numerical formulation. The  
747 computational implementation, along with the source code for solving the boundary value problems listed below,  
748 is available as a public code repository on GitHub [99].

## 749 List of 3D simulations

750 For each of the 3D simulations, we solve the governing equation given by Eq.33 using a force control or dis-  
751 placement control approach, with the relevant displacement, angle and traction boundary conditions. The dis-  
752 placement boundary conditions are applied on the components of the displacement vector,  $\mathbf{u}$ , that is defined as

753 the change in position of a point on the membrane between its current and reference configuration ( $\mathbf{u}(\xi_1, \xi_2) =$   
754  $\mathbf{x}(\xi_1, \xi_2) - \mathbf{X}(\xi_1, \xi_2)$ ). The angle boundary conditions, where needed, are enforced through the weak formulation  
755 using a penalty approach and result in the normal vector ( $\mathbf{n}$ ) at the boundaries to align along the preferred direction.  
756 In all the simulations, we have two boundaries, and these are identified as the inner boundary ( $\Gamma_I$ ) and the outer  
757 boundary ( $\Gamma_O$ ) as indicated in the schematic in Figure 1B. The specific numerical simulations in this work using  
758 the 3D model are described below.

759 • **Tube pulling**

The tube pulling simulation shown in Figure S1(A) considers a reference circular plate geometry with an outer radius of 20 nm, and an inner radius of 0.2 nm. The boundary value problem is solved as a force control problem with a traction on the inner boundary ( $\Gamma_I$ ). The displacement and traction boundary conditions are as follows:

$$\begin{aligned}t_y &= h \quad \text{on } \Gamma_I \\u_x &= 0 \quad \& \quad u_z = 0 \quad \text{on } \Gamma_I \\u_y &= 0 \quad \text{on } \Gamma_O\end{aligned}$$

760 See Movie M12 in the supplementary information for the evolution of the membrane deformation.

761 • **Whole tubule**

The whole tubule simulations shown in Figure 4 consider pinching at three different locations, identified as the cap, tube and base locations (Figure 2A). For the tubule geometry, shown in Figure 2A, the tubule radius is 20 nm and height is 100 nm. The inner boundary ( $\Gamma_I$ ) at the top of the tubule has a radius of 0.2 nm and the outer boundary ( $\Gamma_O$ ) at the base of the tubule has a radius of 40 nm. The boundary value problem is solved as a force control problem with pressure applied on a collar ( $\Omega_{\text{collar}}$ ) located at the cap, tube or base location. In addition, the displacement boundary conditions are as follows:

$$\begin{aligned}u_x &= 0 \quad \text{on } \Gamma_I \\u_y &= 0 \quad \text{on } \Gamma_I \\u_z &= 0 \quad \text{on } \Gamma_I\end{aligned}$$

762 See Movies M1-M3 in the supplementary information for the evolution of the constriction process for the  
763 cap, tube and base locations.

764 • **Base**

The constriction simulation shown in Figure 5 considers pinching at the base location. The tube geometry considered has a radius of 20 nm, and a height of 80 nm. The tube boundary on the top is identified as

the inner boundary ( $\Gamma_I$ ) and the tube boundary at the bottom is identified as the outer boundary ( $\Gamma_O$ ). The boundary value problem is solved as a force control problem with pressure applied on a collar ( $\Omega_{\text{collar}}$ ) located at the base location. In addition, the displacement boundary conditions are as follows:

$$u_x = 0 \quad \text{on} \quad \Gamma_I$$

$$u_y = 0 \quad \text{on} \quad \Gamma_I$$

$$u_z = 0 \quad \text{on} \quad \Gamma_I$$

765 See Movie M3 in the supplementary information for the evolution of the constriction process for the base  
766 location.

767 • **Cap**

The constriction simulation shown in Figure S3 considers pinching at the cap location. The cap geometry is a hemisphere with a radius of 20 nm. The cap boundary on the top, with a small radius of 1 nm, is identified as the inner boundary ( $\Gamma_I$ ) and the cap boundary at the bottom is identified as the outer boundary ( $\Gamma_O$ ). This boundary value problem is solved as a displacement control problem, as the force control problem is numerically unstable due to the rigid body modes induced under the displacement boundary conditions considered. As this problem is solved as a displacement control problem, this enforces axisymmetry of the pinching profile. The displacement boundary conditions are as follows:

$$u_x = g \quad \text{on} \quad \Gamma_O$$

$$u_y = 0 \quad \text{on} \quad \Gamma_O$$

$$u_z = g \quad \text{on} \quad \Gamma_O$$

768 See Movie M13 in the supplementary information for the evolution of the constriction process for the cap  
769 location.

770 • **Tube**

The constriction simulation shown in Figure S4 considers pinching at the tube location. The tube geometry is a cylinder with a radius of 20 nm. The tube boundary on the top is identified as the inner boundary ( $\Gamma_I$ ) and the boundary at the bottom is identified as the outer boundary ( $\Gamma_O$ ). This boundary value problem is solved as a displacement control problem. Like in the case of the cap simulation, as this problem is solved as a displacement control problem, this enforces axisymmetry of the pinching profile. The displacement

boundary conditions are as follows:

$$u_x = g \quad \text{on} \quad \Gamma_O$$

$$u_z = g \quad \text{on} \quad \Gamma_O$$

$$u_y = 0 \quad \text{on} \quad \Gamma_I$$

771 See Movie M14 in the supplementary information for the evolution of the constriction process with displace-  
772 ment control for the tube location.

773

774 We also solve a force control equivalent of this problem, and this is shown in Figure S5. This case is discussed  
775 below in the simulation of the helical force collar at the tube location with a zero helical pitch. See Movie  
776 M15 in the supplementary information for the evolution of the constriction process with force control for the  
777 tube location.

778 • **Helical force collar at the tube location**

The constriction simulation shown in Figure 6 considers pinching at the tube location due to helical collar. In Figure 6A we consider a single helical ring, and in Figure 6G we consider three helical rings. The tube geometry considered for the single helical ring case has a radius of 20 nm, and a height of 40 nm. The tube geometry considered for the three helical rings case has a radius of 20 nm, and a height of 200 nm. For both cases, the tube boundary on the top is identified as the inner boundary ( $\Gamma_I$ ) and the tube boundary at the bottom is identified as the outer boundary ( $\Gamma_O$ ). The boundary value problem is solved as a force control problem with pressure applied on a helical collar ( $\Omega_{\text{collar}}$ ) located at the tube location. In addition, the displacement boundary conditions are as follows:

$$u_x = 0 \quad \text{on} \quad \Gamma_I$$

$$u_y = 0 \quad \text{on} \quad \Gamma_I$$

$$u_z = 0 \quad \text{on} \quad \Gamma_I$$

$$u_x = 0 \quad \text{on} \quad \Gamma_O$$

$$u_y = 0 \quad \text{on} \quad \Gamma_O$$

$$u_z = 0 \quad \text{on} \quad \Gamma_O$$

779 See Movies M4-M6 in the supplementary information for the evolution of the constriction process due to a  
780 helical force collar at the tube location with a non-dimensional pitch of zero, two and four, respectively, and  
781 movie M7 for the corresponding evolution of the constriction process due to a force collar with three helical  
782 rings.

783 • **Helical force collar at the base location**

The constriction simulation shown in Figure 7 considers pinching at the base location due to helical collar. In Figure 7A we consider a single helical ring, and in Figure 7G we consider three helical rings. The tube geometry considered for the single helical ring case has a radius of 20 nm, and a height of 40 nm. The tube geometry considered for the three helical rings case has a radius of 20 nm, and a height of 200 nm. For both cases, the tube boundary on the top is identified as the inner boundary ( $\Gamma_I$ ) and the tube boundary at the bottom is identified as the outer boundary ( $\Gamma_O$ ). The boundary value problem is solved as a force control problem with pressure applied on a helical collar ( $\Omega_{\text{collar}}$ ) located at the base location. In addition, the displacement boundary conditions are as follows:

$$u_x = 0 \quad \text{on} \quad \Gamma_I$$

$$u_y = 0 \quad \text{on} \quad \Gamma_I$$

$$u_z = 0 \quad \text{on} \quad \Gamma_I$$

784 See Movies M8-M10 in the supplementary information for the evolution of the constriction process due to  
785 a helical force collar at the base location with a non-dimensional pitch of zero, two and four, respectively,  
786 and movie M11 for the corresponding evolution of the constriction process due to a force collar with three  
787 helical rings.

788 **Analytical solution for tube pulling simulation**

789 The equilibrium values of  $R_0$  and  $f_0$  for a membrane tube are defined as

$$R_0 = \sqrt{\kappa/(2\sigma)}, \quad (38)$$

$$f_0 = 2\pi\sqrt{(2\sigma\kappa)}, \quad (39)$$

790 where  $\kappa$  is the bending rigidity,  $\sigma$  is the membrane tension. For bending rigidity of 20 pN·nm and membrane  
791 tension 0.1 pN/nm, we get

$$f_0 = 12.5664 \text{ pN}, \quad (40)$$

792 which is the equilibrium value of force obtained in Fig. S1.

793 **List of movies**

- 794 ● Movie M1: Evolution of the constriction process for the cap location for the whole tubule geometry.
- 795 ● Movie M2: Evolution of the constriction process for the tube location for the whole tubule geometry.
- 796 ● Movie M3: Evolution of the constriction process for the base location for the whole tubule geometry.
- 797 ● Movie M4: Evolution of the constriction process due to a single helical force collar at the tube location with  
798 a non-dimensional pitch of zero.
- 799 ● Movie M5: Evolution of the constriction process due to a single helical force collar at the tube location with  
800 a non-dimensional pitch of two.
- 801 ● Movie M6: Evolution of the constriction process due to a single helical force collar at the tube location with  
802 a non-dimensional pitch of four.
- 803 ● Movie M7: Evolution of the constriction process due to a force collar with three helical rings at the tube  
804 location.
- 805 ● Movie M8: Evolution of the constriction process due to a single helical force collar at the base location with  
806 a non-dimensional pitch of zero.
- 807 ● Movie M9: Evolution of the constriction process due to a single helical force collar at the base location with  
808 a non-dimensional pitch of two.
- 809 ● Movie M10: Evolution of the constriction process due to a single helical force collar at the base location  
810 with a non-dimensional pitch of four.
- 811 ● Movie M11: Evolution of the constriction process due to a force collar with three helical rings at the base  
812 location.
- 813 ● Movie M12: Evolution of membrane deformation for pulling of a tubule from a flat membrane.
- 814 ● Movie M13: Evolution of a axisymmetric constriction profile due to a displacement control approach of  
815 constriction at the cap location.
- 816 ● Movie M14: Evolution of a axisymmetric constriction profile due to a displacement control approach of  
817 constriction at the tube location.
- 818 ● Movie M15: Evolution of a non-axisymmetric constriction profile due to a force control approach of con-  
819 striction at the tube location.

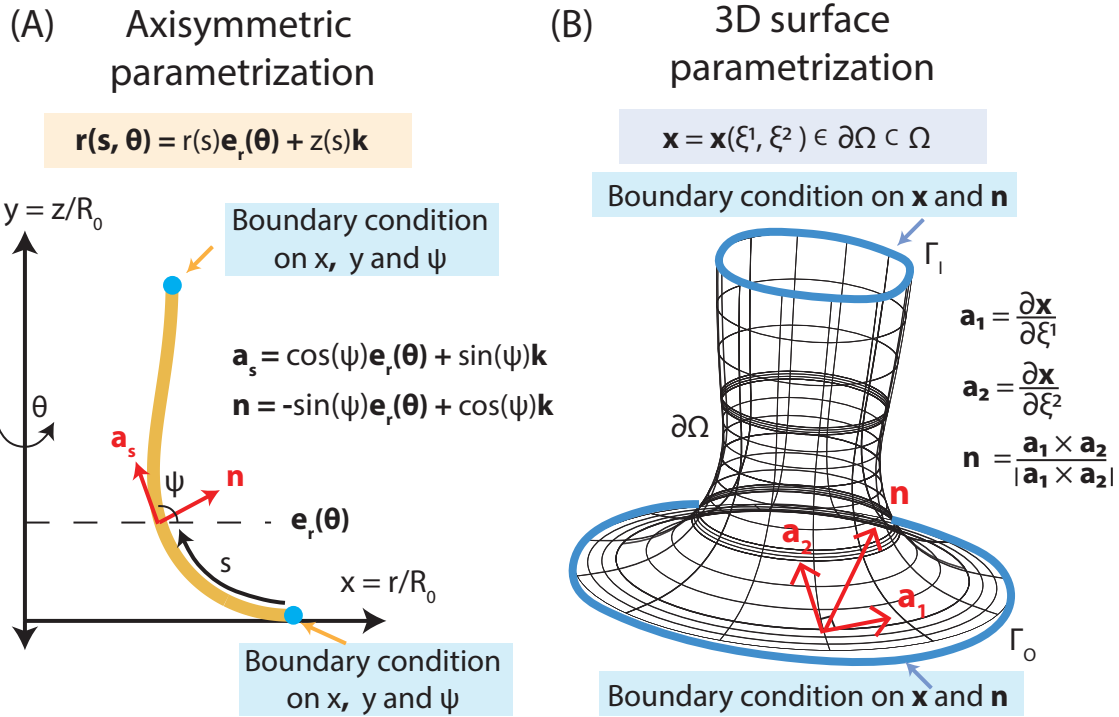

Figure 1: Schematics showing surface parametrization of the membrane geometry in the axisymmetric and 3D formulations. (A) The axisymmetric coordinate system is parametrized in terms of the unit tangent vector ( $\mathbf{a}_s$ ), unit surface normal vector ( $\mathbf{n}$ ) and arc length ( $s$ ), where  $\mathbf{r}(s, \theta)$  is the position vector,  $s$  is the arc length along the axisymmetric curve,  $\theta$  is the out-of-plane rotation angle,  $r$  is the radius,  $z$  is the height,  $\mathbf{e}_r$  is the unit radial vector and  $\mathbf{k}$  is the unit axial vector.  $(\mathbf{e}_r, \mathbf{e}_\theta, \mathbf{k})$  forms the coordinate basis (see SOM for more details). (B) Parametrization of a surface ( $\partial\Omega$ ) embedded in a 3D volume ( $\Omega$ ). Here,  $\mathbf{x}$  is the position vector of a point on the surface parametrized in terms of the surface coordinates  $(\xi^1, \xi^2)$  which are associated with a flat 2D domain that is then mapped to  $\partial\Omega$  by  $\mathbf{x} = \mathbf{x}(\xi^1, \xi^2)$ .  $\mathbf{a}_1$  and  $\mathbf{a}_2$  are the local tangent vectors to the surface at  $\mathbf{x}$ , and  $\mathbf{n}$  is the corresponding surface normal.  $(\mathbf{a}_1, \mathbf{a}_2, \mathbf{n})$  forms the local coordinate basis. The axisymmetric coordinate system in (A) is a specialization of the general curvilinear coordinate system depicted in (B).

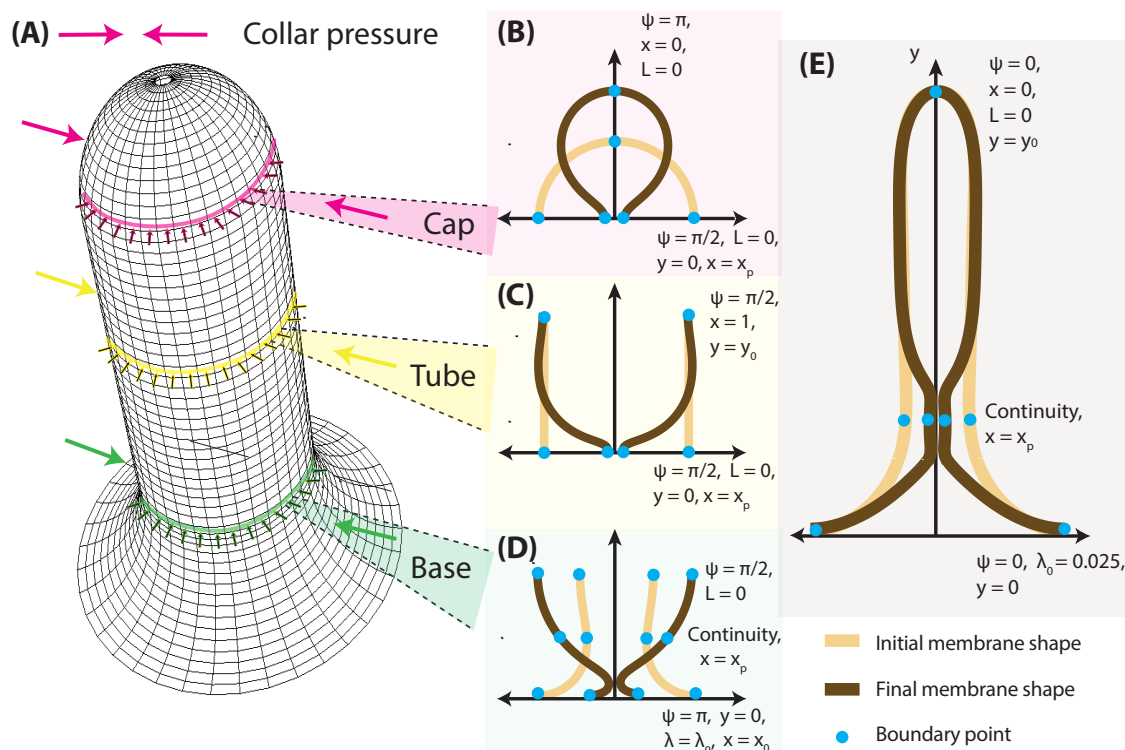

Figure 2: Schematic depicting the modeling framework and simulation set up. Localized forces acting on the membrane were simulated as a collar pressure (A). Three different pinching locations are considered along the membrane tubule. (B) Case 1: Collar pressure applied at a circumference near the cap of the tube, where the mean and Gaussian curvatures are positive. (C) Case 2: Collar pressure applied at the center of the tube, where the mean curvature is positive and Gaussian curvature is zero. (D) Case 3: Collar pressure applied at a circumference at the base of the tube, where the mean curvature is positive along the cylindrical region and negative along the boundary, and Gaussian curvature is negative. (E) Case 4: Collar pressure applied along a tubule of fixed length pulled from an initially flat membrane. Shown are the initial membrane shape (light brown), final membrane shape (dark brown) and boundary/interface points (blue dots).  $x = x_p$  is an interface condition enforced in axisymmetry to solve for the collar pressure as an unknown parameter.



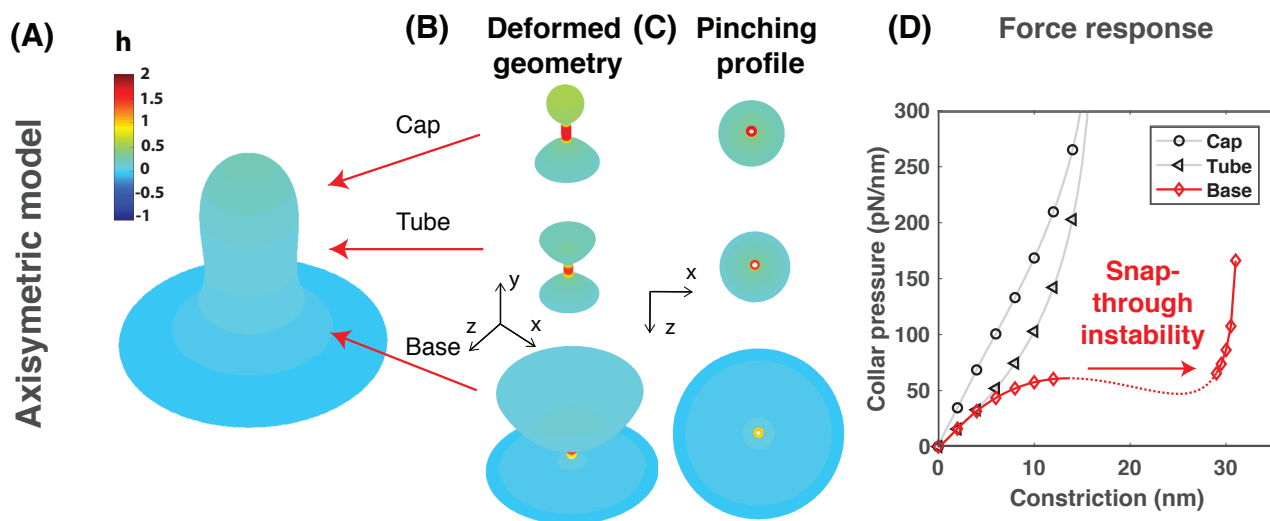

Figure 3: Location dependence of membrane tube constriction in axisymmetry. Shown are the different locations of constriction, cap, tube and base (A), the corresponding membrane shapes (pinched configurations) obtained (B, C) and the evolution of the collar pressure as a function of constriction (force response, D). The bending rigidity  $\kappa$  is 320 pN-nm, membrane tension  $\lambda$  is 0.2 pN/nm, radius of the tube is 20 nm, the radially inward-directed collar pressure is applied over a strip of height 1 nm, and the height of the membrane tubule is 100 nm. The cap and the tube locations deform smoothly, while a snap-through instability is observed at the base (D). The dotted solution path is never realized during the loading phase, leading to a transition to a wider tube morphology that is markedly different from the other cases. The colorbar in (A) shows the non-dimensional mean curvature.

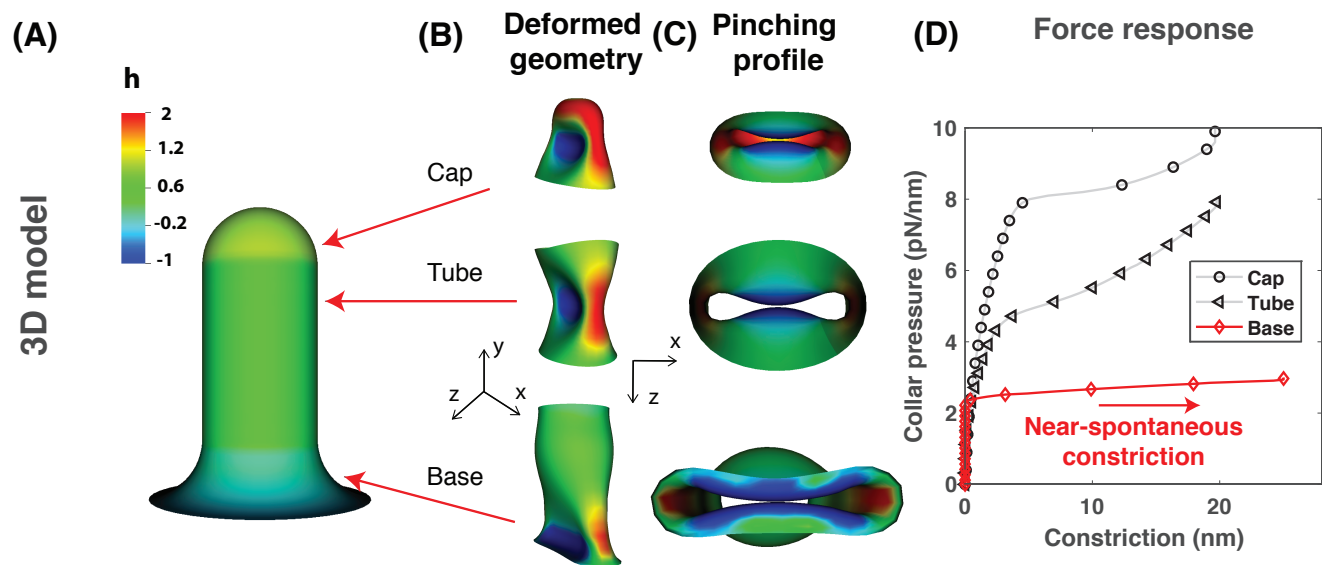

Figure 4: Location dependence of membrane tube constriction in 3D. Shown are the different locations of constriction: cap, tube and base locations (A), the corresponding membrane shapes (pinched configurations) obtained (B, C) and the evolution of the collar pressure as a function of constriction (force response, D). Bending rigidity  $\kappa$  is 320 pNnm, membrane tension  $\lambda$  is 0.2 pN/nm, radius of the tube is 20 nm, height of the applied force is 1 nm, height of the membrane tubule is 100 nm. A near-spontaneous collapse is observed for the base, and a relatively stable constriction evolution for the cap and the tube locations (D). The colorbar in (A) indicates non-dimensional mean curvature. See Movies M1-M3 in the supplementary information for the evolution of the constriction process for the Cap, Tube and Base locations.

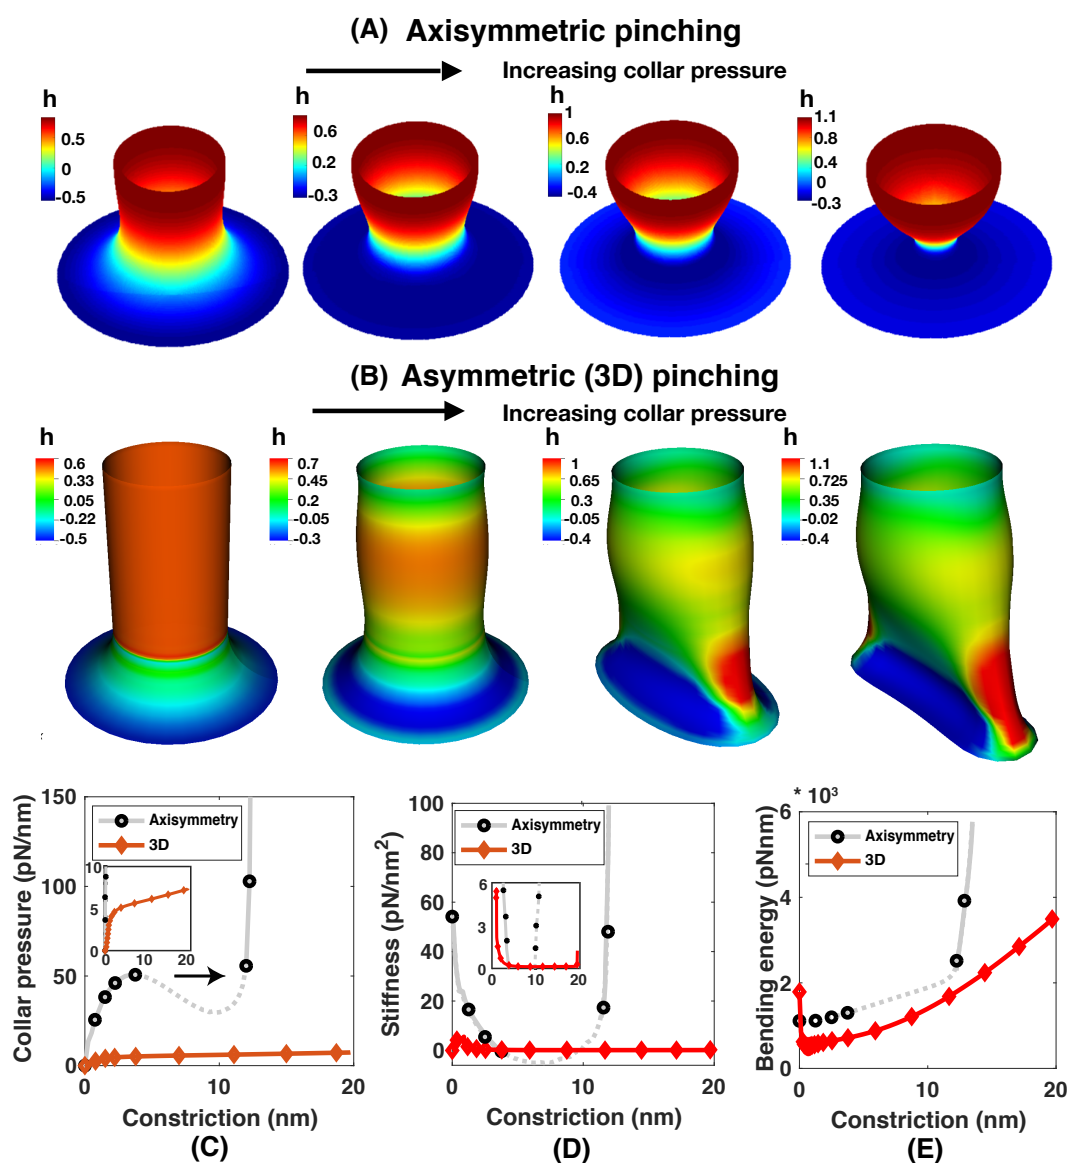

Figure 5: Pinching response of the base geometry and the corresponding evolution of pressure, stiffness and bending energy obtained using the axisymmetric and 3D models. Boundary conditions are shown in Fig. 1, Case 3. Bending rigidity  $\kappa$  is 320 pN·nm, membrane tension is 0.2 pN/nm, the collar pressure is applied over a height of 1 nm, and the length scale is set by the initial radius of 20 nm. Shown are the membrane shape evolution obtained from the axisymmetric (A) and 3D models (B), and the corresponding variation of the collar pressure (C, with inset), stiffness (D, with inset), and bending energy (E). Colorbars in (A) and (B) indicate non-dimensional mean curvature. See Movie M3 in the supplementary information for the evolution of the constriction process for the base geometry.

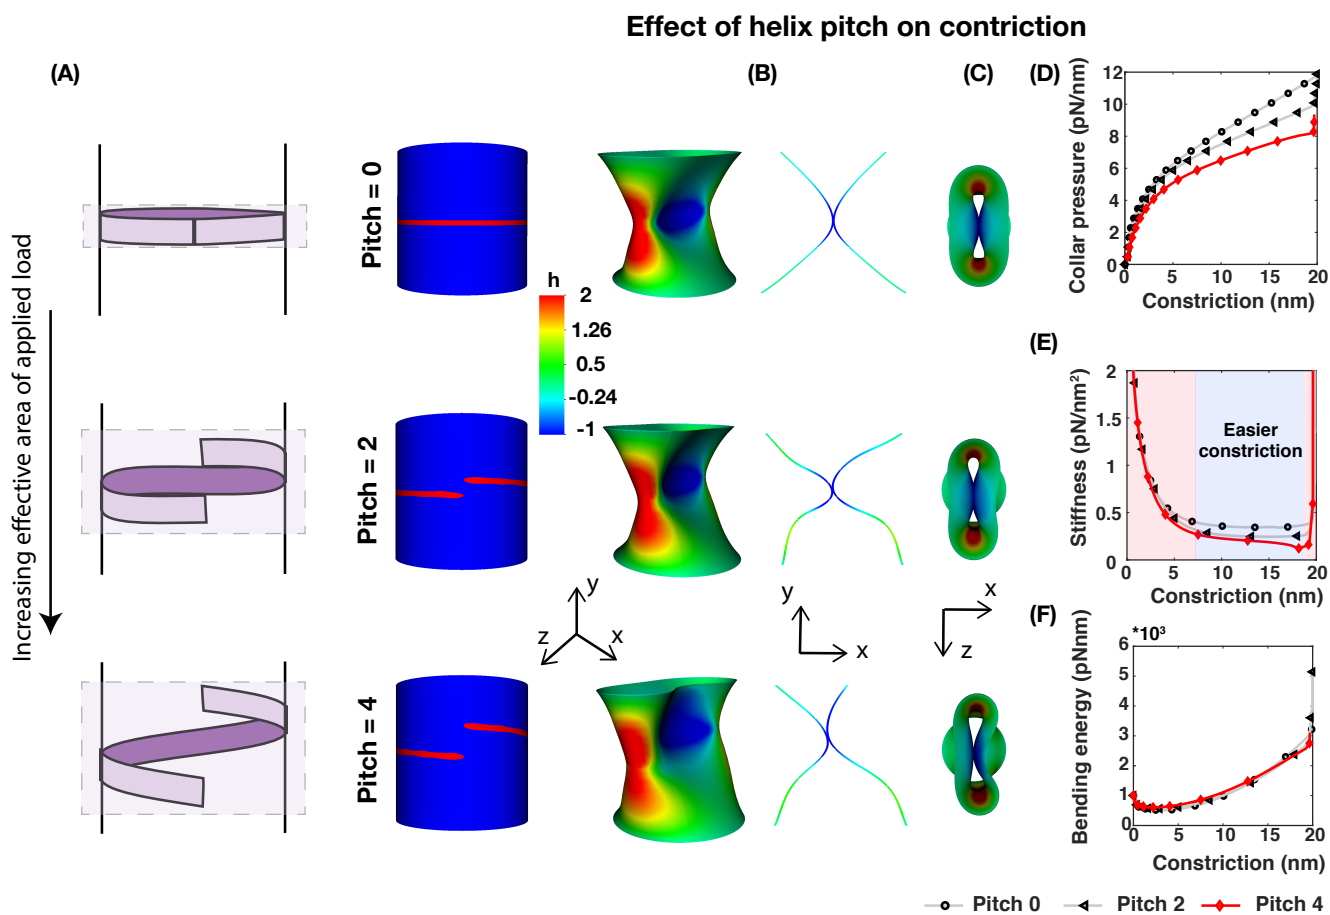

Figure 6: A helical force collar further reduces the barrier to constriction. Considering force collars with a normalized pitch of zero, two and four, shown are the shape of the helical collar (A) with a schematic depicting increased span of load distribution area with increasing helical pitch

, deformed shape and corresponding pinching shape (B), the pinching profile (C), and evolution of the collar pressure (D), stiffness (E), and membrane bending energy (F). Shaded regions of pink and blue in (E) represents a region of high stiffness ( $> \sim 0.25$  pN/nm<sup>2</sup>) and low stiffness ( $< \sim 0.25$  pN/nm<sup>2</sup>) respectively. The colorbar under (B) indicates non-dimensional mean curvature. See Movies M4-M6 in the supplementary information for the evolution of the constriction process due to a helical force collar at the tube location with a non-dimensional pitch of zero, two and four, respectively.

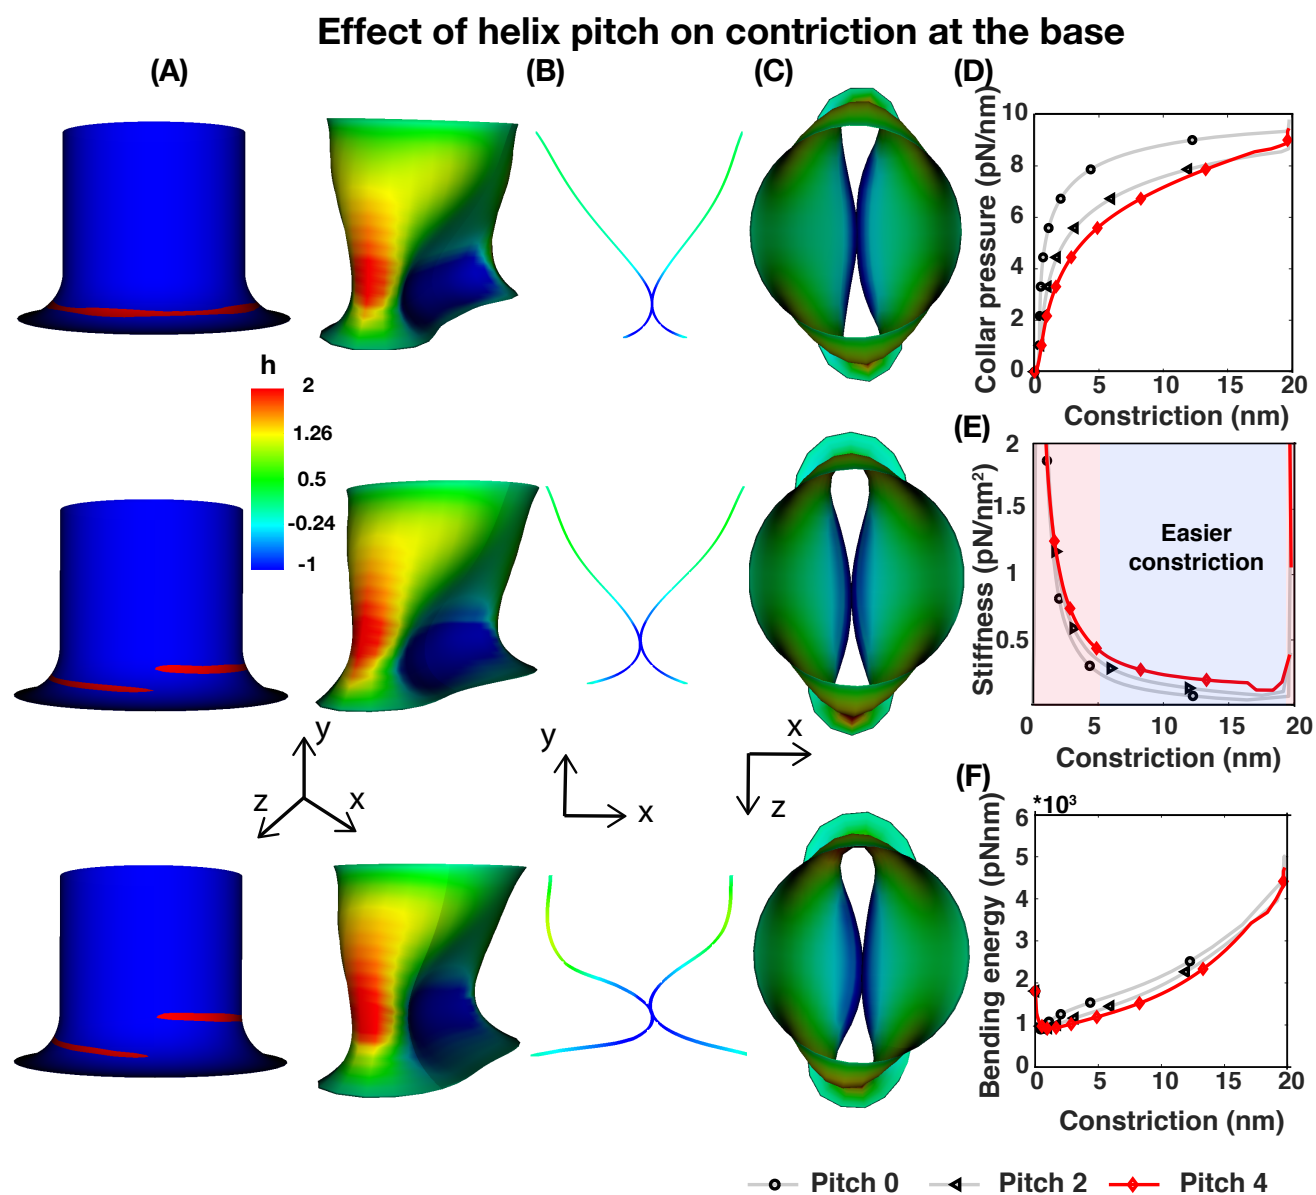

Figure 7: A helical force collar increases stiffness to constriction at the base. Considering force collars with a normalized pitch of zero, two and four, shown are the shape of the helical collar and deformed shape for pitch two and four (A-C), evolution of the collar pressure (D), stiffness (E), and membrane bending energy (F). Shaded regions of pink and blue in (E) represents a region of high stiffness (>~ 0.25 pN/nm<sup>2</sup>) and low stiffness (<~ 0.25 pN/nm<sup>2</sup>) respectively. The colorbar under (B) indicates non-dimensional mean curvature. See Movies M8-M10 in the supplementary information for the evolution of the constriction process due to a helical force collar at the base location with a non-dimensional pitch of zero, two and four, respectively.

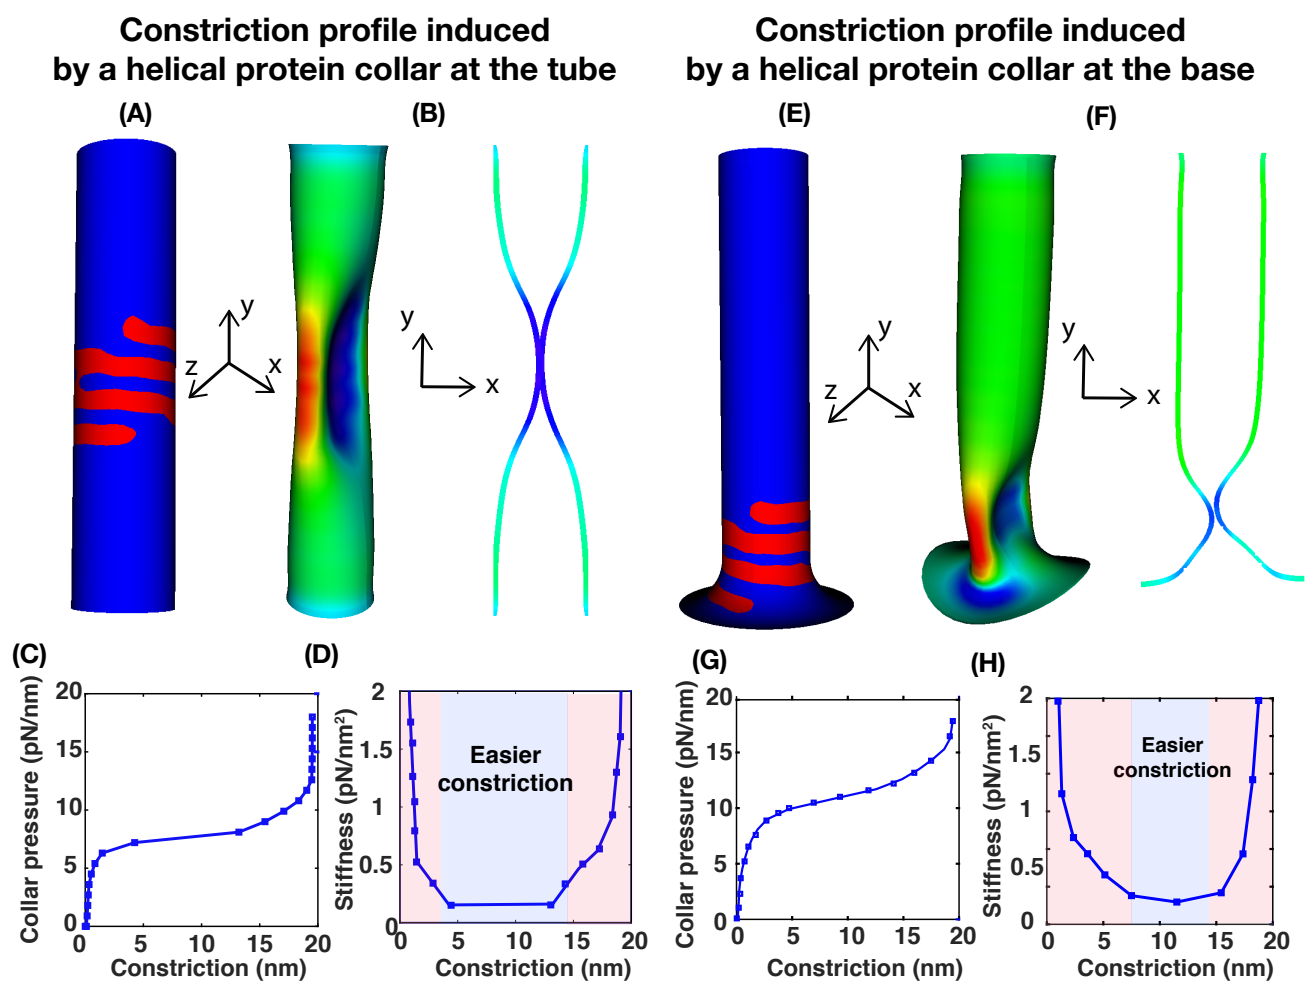

Figure 8: Constriction by multiple helical rings are also location dependent. For both the tubule and base geometry, shown are the initial geometry and location of the force collar with three helical rings (A, E), the deformed shape and corresponding pinching profile (B, F) and the corresponding variation of collar pressure (C, G) and stiffness (D, H). See movies M7 and M11 for the corresponding evolution of the constriction process due to a force collar with three helical rings.

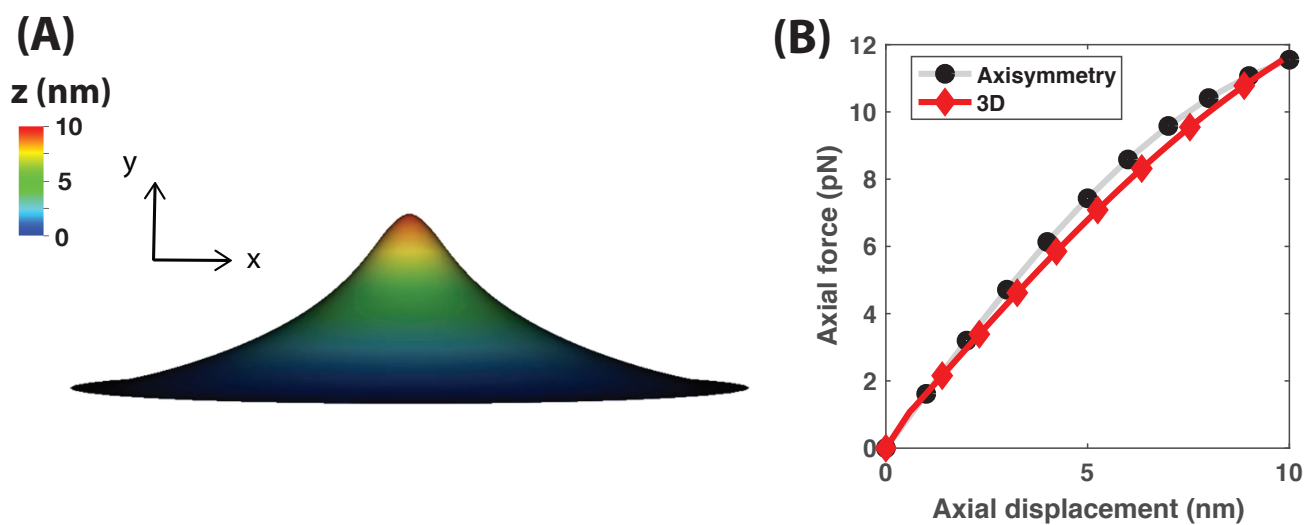

Figure S1: Comparison of the axial force required to deform a flat membrane patch up to a height of 10 nm. Bending rigidity is 20 pN·nm and membrane tension is 0.1 pN/nm. The results obtained from the axisymmetric model and the 3D framework are compared. The analytical solution for the equilibrium value of force is 12.5664 pN. (A) Membrane shape at a deformation of 10 nm. Colorbar indicates the height (nm). (B) Axial force vs height of membrane in axisymmetry and 3D. See Movie M12 in the supplementary information for the evolution of the membrane deformation.

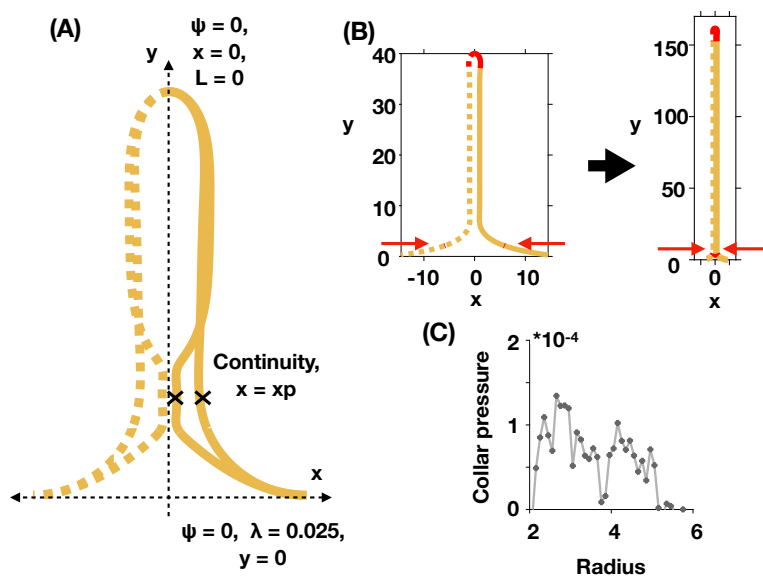

Figure S2: No snap-through instability is observed for constriction at the base of a tubule without the fixed height boundary condition. Membrane tension is 0.2 pN/nm, bending rigidity is 320 pN·nm. (A) Schematic depicting the boundary conditions used. The difference with the B.Cs in Eq. 27 is that the height is no longer constrained. This implies that the axial force is fixed. Thus, this simulation represents a system of 12 equations with 1 unknown parameter and 13 boundary conditions (Eq. 24). (B) Initial and final membrane shapes obtained for constriction at the base of the tubule. (C) Collar pressure vs radius at the break point. Pressure is negligible (order of magnitude is  $10^{-4}$ .)



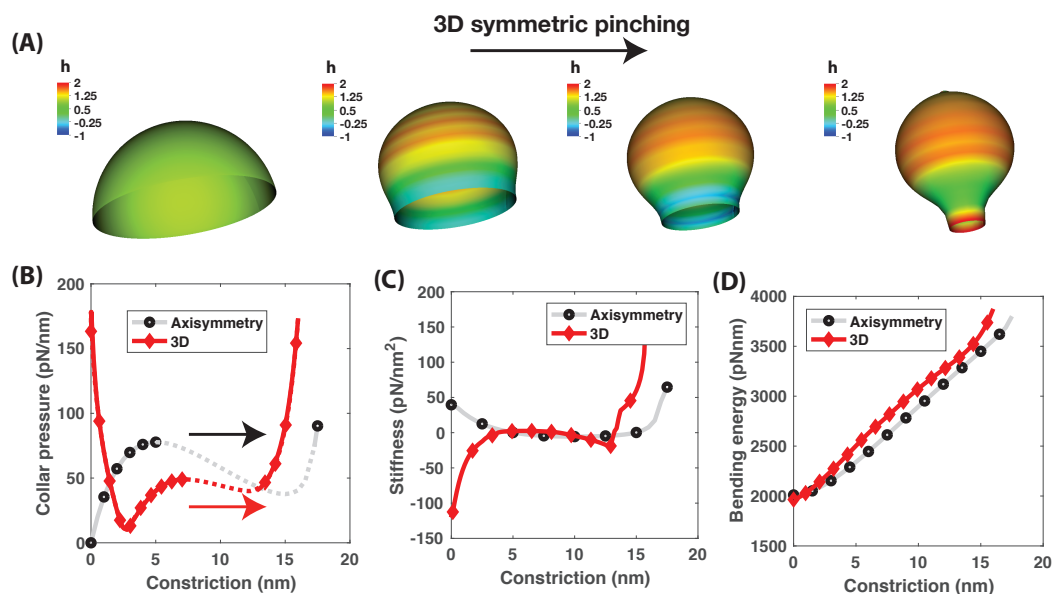

Figure S3: Comparison of collar pressure, stiffness and bending energy during constriction of a membrane cap using the axisymmetric and 3D framework. Axisymmetry is enforced in the 3D simulation by solving as a displacement control problem. Boundary conditions used are shown in Fig. 1, case 1. Bending rigidity is 320 pN/nm, Radius is 20 nm. (A) Membrane shapes during constriction of spherical membrane in 3D. Colorbar is the normalized mean curvature. (B) Collar pressure vs constriction in 3D and axisymmetry. (C) Stiffness vs constriction in 3D and in axisymmetry. (D) Bending energy vs constriction in 3D and axisymmetry. See Movie M13 in the supplementary information for the evolution of the constriction process.

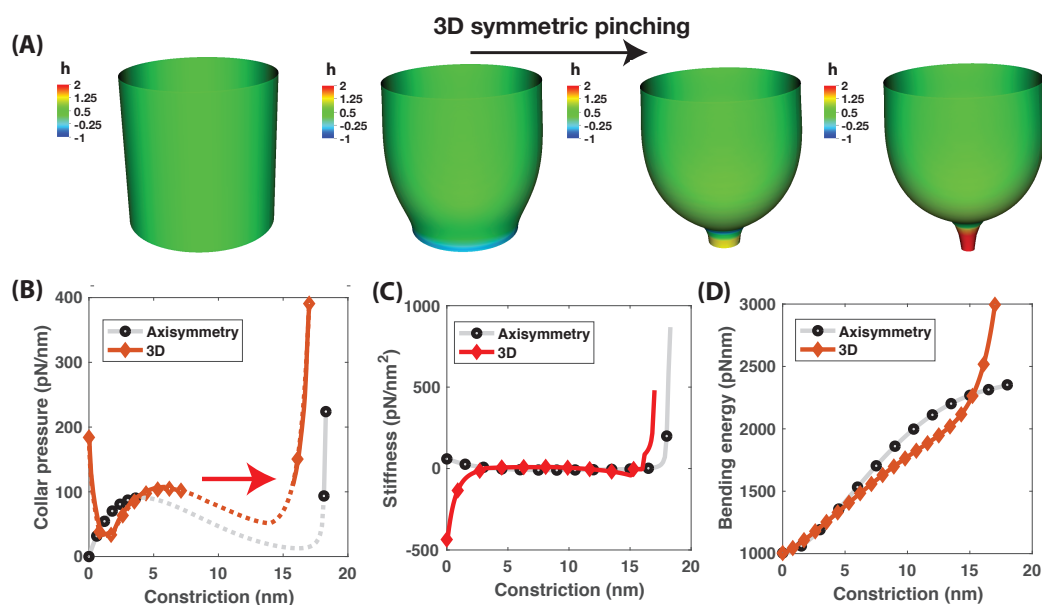

Figure S4: Comparison of collar pressure, stiffness and bending energy during constriction of a membrane cylinder using the axisymmetric and 3D framework. Axisymmetry is enforced in the 3D simulation by solving as a displacement control problem. Boundary conditions used are those shown in Fig. 1, case 2. Bending rigidity is  $320 \text{ pN} \cdot \text{nm}$ , length scale  $R_0$  is  $20 \text{ nm}$ . (A) Membrane shapes during constriction of cylindrical membrane in 3D. Colorbar is the normalized mean curvature. (B) Collar pressure vs constriction in 3D and axisymmetry. (C) Stiffness vs constriction in 3D and in axisymmetry. (D) Bending energy vs constriction in 3D and axisymmetry. See Movie M14 in the supplementary information for the evolution of the constriction process.

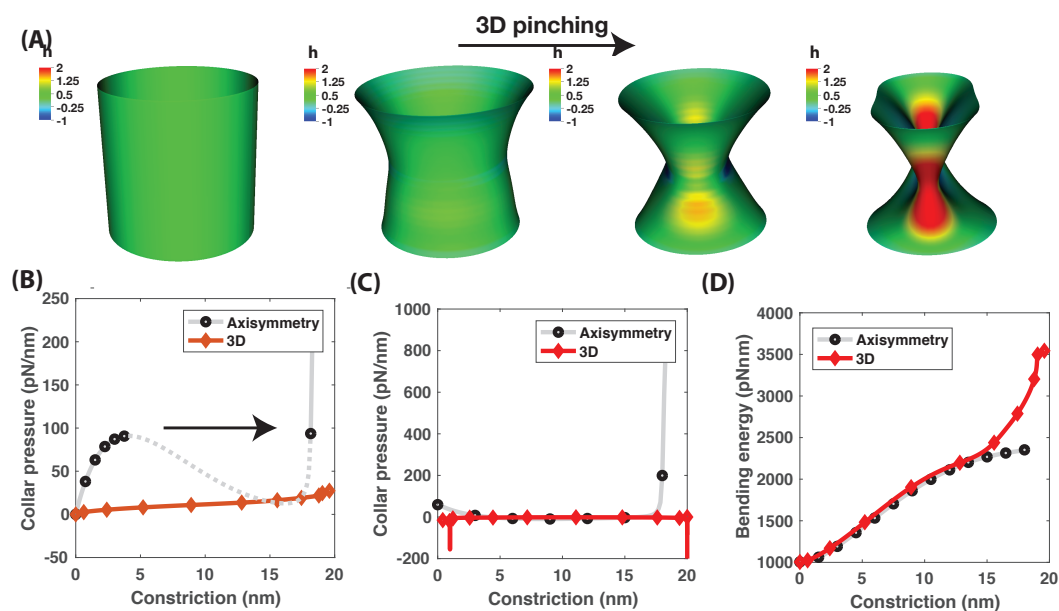

Figure S5: Comparison of collar pressure, stiffness and bending energy during constriction of a membrane cylinder using the axisymmetric and 3D framework. Bending rigidity is 320 pN/nm, Radius is 20 nm. (A) Membrane shapes during constriction of cylindrical membrane in 3D. Colorbar is the normalized mean curvature. (B) Collar pressure vs constriction in 3D and axisymmetry. (C) Stiffness vs constriction in 3D and in axisymmetry. (D) Bending energy constriction in 3D and axisymmetry. See Movie M15 in the supplementary information for the evolution of the constriction process.

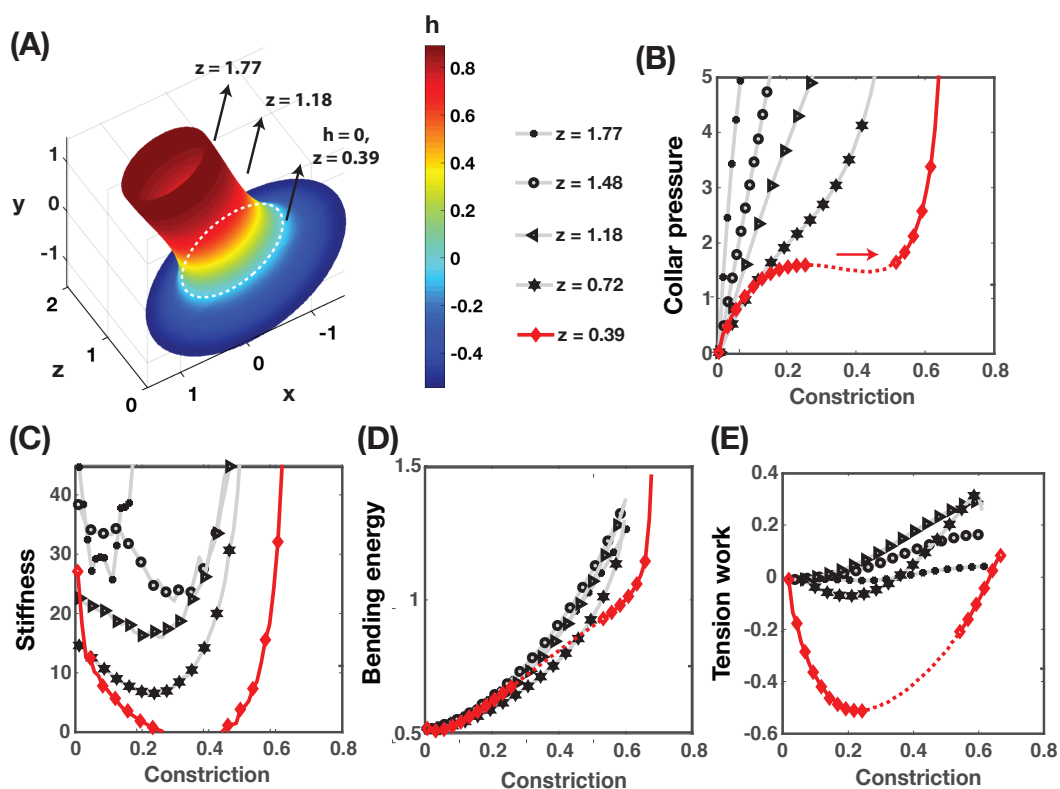

Figure S6: The snap-through instability for constriction at the base is regulated by a variation in local tension. Membrane tension at the boundary is 0.2 pN/nm, bending rigidity is 320 pNm, Radius is 20 nm, area of applied force is 1/200th of the membrane area.  $z$  is the non-dimensional height at a given location along the membrane from the bottom. Shown are the (A) Mean curvature distribution (non-dimensional) and the location of the local minimal surface (dotted line at  $y = 0.39$ ) where the mean curvature vanishes ( $h = 0$ ), (B) Collar pressure, (C) Tubule stiffness to pinching, (D) Bending energy and (E) Tension work as a function of the constriction.
